# Supplementary material for: Deep-blue phosphorescence from platinum(ii) bis(acetylide) complexes with sulfur-bridged dipyridyl ligands
Source: Royal Society of Chemistry journal article supplement (doi:10.1039/d4sc08205b), 2025-01-01
Supplement: d4sc08205b1.pdf [file d4sc08205b1.pdf]

## Supporting Information

### Deep-blue phosphorescence from platinum(II) bis(acetylide) complexes with sulfur-bridged dipyridyl ligands

*Ka-Ming Tong, Jessica Toigo, Michael O. Wolf\**

Department of Chemistry, University of British Columbia, Vancouver, British Columbia  
V6T 1Z1, Canada

| <b>Table of Contents</b>   | <b>Page</b> |
|----------------------------|-------------|
| Experimental Section       | S2          |
| NMR Spectra                | S9          |
| Crystallographic data      | S19         |
| Thermogravimetric analysis | S29         |
| Photophysical data         | S30         |
| Electrochemistry           | S36         |
| Computational data         | S38         |
| References                 | S52         |

## Experimental Section

**Materials and Reagents.** Solvents were reagent grade and used without any further purification. Potassium tetrachloroplatinate was purchased from Strem Chemicals. Phenylacetylene was purchased from Thermo Fisher Scientific Inc. Copper(I) iodide and poly(methyl methacrylate) (PMMA) were purchased from Sigma-Aldrich. Diisopropylamine was purchased from Alfa Aesar. The reference complex  $[\text{Pt}(\text{bpy})(\text{C}\equiv\text{CPh})_2]$ ,<sup>1</sup> bis(pyridin-2-yl)sulfane (**DPS**), 2,2'-sulfonyldipyridine (**DPSO**), 2,2'-sulfonyldipyridine (**DPSO**<sub>2</sub>), bis(4-methylpyridin-2-yl)sulfane (**MeDPS**), 2,2'-sulfonylbis(4-methylpyridine) (**MeDPSO**) and 2,2'-sulfonylbis(4-methylpyridine) (**MeDPSO**<sub>2</sub>) were synthesized using literature methods.<sup>2</sup>

**Synthesis.** All experiments were performed under an inert atmosphere of nitrogen using standard Schlenk techniques unless otherwise stated.

***cis*-[Pt(DPS)Cl<sub>2</sub>]:** To a solution of K<sub>2</sub>[PtCl<sub>4</sub>] (50 mg, 0.120 mmol) in 15 mL of water was added **DPS** (mg, 0.120 mmol, 1.0 equiv), and acidified with 1.0 mL of 4 M HCl. The mixture was heated at 70 °C for 2 hours under nitrogen. The yellow precipitates were filtered off and washed with water, followed by ethanol and diethyl ether. The precipitates were then dried under reduced pressure to give pale yellow solids. Subsequent recrystallization from vapour diffusion of *n*-pentane into a dichloromethane solution of ***cis*-[Pt(DPS)Cl<sub>2</sub>]** gave pale yellow crystals. Yield: 41 mg, 75%. <sup>1</sup>H NMR (CD<sub>2</sub>Cl<sub>2</sub>, 400 MHz): δ 9.19 (dd, *J* = 5.8, 1.3 Hz, 2H), 7.97–7.78 (m, 4H), 7.37 (ddd, *J* = 7.4, 5.9, 1.9 Hz, 2H). <sup>13</sup>C{<sup>1</sup>H} NMR (CD<sub>2</sub>Cl<sub>2</sub>, 100 MHz): δ 156.01, 152.48, 139.84, 128.61, 125.90. HR-ESI MS *m/z* calcd C<sub>10</sub>H<sub>8</sub>Cl<sub>2</sub>N<sub>2</sub>PtSNa [M+Na]<sup>+</sup>: 475.9331; found, 475.9318.

***cis*-[Pt(DPSO)Cl<sub>2</sub>]:** The complex was prepared according to a procedure similar to that for ***cis*-[Pt(DPS)Cl<sub>2</sub>]**, except **DPSO** was used in place of **DPS**. Yield: 50 mg, 88%. <sup>1</sup>H NMR (CD<sub>2</sub>Cl<sub>2</sub>, 400 MHz): δ 9.12 (dd, *J* = 5.7, 0.8 Hz, 2H), 8.19 (td, *J* = 7.8, 1.5 Hz, 2H), 8.03 (m, 2H),

7.56 (ddd,  $J = 7.5, 5.7, 1.5$  Hz, 2H). HR-ESI MS  $m/z$  calcd  $C_{10}H_{12}Cl_2N_3OPtS$   $[M+NH_4]^+$ : 486.9726; found, 486.9716.

***cis*-[Pt(DPSO<sub>2</sub>)Cl<sub>2</sub>]**: The complex was prepared according to a procedure similar to that for ***cis*-[Pt(DPS)Cl<sub>2</sub>]**, except **DPSO<sub>2</sub>** was used in place of **DPS**. Yield: 46 mg, 78%. <sup>1</sup>H NMR (CD<sub>2</sub>Cl<sub>2</sub>, 400 MHz):  $\delta$  9.48 (dd,  $J = 5.7, 0.8$  Hz, 2H), 8.40 (dd,  $J = 7.8, 1.1$  Hz, 2H), 8.27 (td,  $J = 7.8, 1.5$  Hz, 2H), 7.74 (ddd,  $J = 7.5, 5.7, 1.6$  Hz, 2H). HR-ESI MS  $m/z$  calcd  $C_{10}H_8Cl_2N_2O_2PtSK$   $[M+K]^+$ : 523.8968; found, 523.8959.

***cis*-[Pt(MeDPS)Cl<sub>2</sub>]**: The complex was prepared according to a procedure similar to that for ***cis*-[Pt(DPS)Cl<sub>2</sub>]**, except **MeDPS** was used in place of **DPS**. Subsequent recrystallization from vapour diffusion of *n*-pentane into a dichloromethane solution of ***cis*-[Pt(MeDPS)Cl<sub>2</sub>]** gave pale yellow crystals. Yield: 36 mg, 62%. <sup>1</sup>H NMR (CD<sub>2</sub>Cl<sub>2</sub>, 400 MHz):  $\delta$  8.97 (d,  $J = 6.1$  Hz, 2H), 7.65 (d,  $J = 2.0$  Hz, 2H), 7.16 (dd,  $J = 6.1, 2.0$  Hz, 2H), 2.39 (s, 6H). <sup>13</sup>C{<sup>1</sup>H} NMR (CD<sub>2</sub>Cl<sub>2</sub>, 100 MHz):  $\delta$  154.85, 152.77, 151.67, 129.17, 126.67, 21.23. HR-ESI MS  $m/z$  calcd  $C_{12}H_{16}Cl_2N_3PtS$   $[M+NH_4]^+$ : 499.0090; found, 499.0077.

***cis*-[Pt(MeDPSO)Cl<sub>2</sub>]**: The complex was prepared according to a procedure similar to that for ***cis*-[Pt(DPS)Cl<sub>2</sub>]**, except **MeDPSO** was used in place of **DPS**. Yield: 54 mg, 90%. <sup>1</sup>H NMR (CD<sub>2</sub>Cl<sub>2</sub>, 400 MHz):  $\delta$  8.90 (d,  $J = 5.9$  Hz, 2H), 7.81 (d,  $J = 2.0$  Hz, 2H), 7.31 (dd,  $J = 5.5, 1.4$  Hz, 2H), 2.50 (s, 6H). HR-ESI MS  $m/z$  calcd  $C_{12}H_{16}Cl_2N_3OPtS$   $[M+NH_4]^+$ : 515.0039; found, 515.0032.

***cis*-[Pt(MeDPSO<sub>2</sub>)Cl<sub>2</sub>]**: The complex was prepared according to a procedure similar to that for ***cis*-[Pt(DPS)Cl<sub>2</sub>]**, except **MeDPSO<sub>2</sub>** was used in place of **DPS**. Yield: 50 mg, 81%. <sup>1</sup>H NMR (CD<sub>2</sub>Cl<sub>2</sub>, 400 MHz):  $\delta$  9.26 (d,  $J = 5.9$  Hz, 2H), 8.19 (d,  $J = 2.1$  Hz, 2H), 7.51–7.49. (m, 2H), 2.50 (s, 6H). HR-ESI MS  $m/z$  calcd  $C_{12}H_{16}Cl_2N_3O_2PtS$   $[M+NH_4]^+$ : 530.9988; found, 530.9973.

***cis*-[Pt(DPS)(C≡CPh)<sub>2</sub>] (1)**: To a suspension of ***cis*-[Pt(DPS)Cl<sub>2</sub>]** (50 mg, 0.110 mmol) and CuI (2.10 mg, 0.0110 mmol, 0.1 equiv) in degassed dichloromethane–diisopropylamine was added phenylacetylene (45.0 μL, 0.440 mmol). The reaction mixture was stirred overnight at room temperature under an inert nitrogen atmosphere. After solvent removal under reduced pressure, the residue was dissolved in dichloromethane and then precipitated with *n*-hexane. The crude product was filtered and purified by column chromatography on silica gel using dichloromethane. Subsequent recrystallization from vapour diffusion of *n*-pentane into a dichloromethane solution of **1** gave pale yellow crystals. Yield: 47 mg, 73%. <sup>1</sup>H NMR (CDCl<sub>3</sub>, 400 MHz): δ 9.49 (dd, *J* = 5.6, 1.7 Hz, 2H), 7.86 (td, *J* = 7.7, 1.8 Hz, 2H), 7.81–7.79 (m, 2H), 7.42–7.38 (m, 4H), 7.35 (ddd, *J* = 7.3, 5.7, 1.6 Hz, 2H), 7.23–7.14 (m, 4H), 7.11–7.06 (m, 2H). <sup>13</sup>C{<sup>1</sup>H} NMR (CD<sub>2</sub>Cl<sub>2</sub>, 100 MHz): δ 155.32, 151.70, 139.23, 131.73, 128.76, 127.88, 127.78, 125.49, 100.35, 82.14. IR (solid) ν/cm<sup>-1</sup>: 2112, 2128(sh) ν(C≡C). HR-ESI MS *m/z* calcd C<sub>26</sub>H<sub>19</sub>N<sub>2</sub>PtS [M+H]<sup>+</sup>: 586.0917; found, 586.0914.

***cis*-[Pt(DPSO)(C≡CPh)<sub>2</sub>] (2)**: The complex was prepared according to a procedure similar to that for **1**, except ***cis*-[Pt(DPSO)Cl<sub>2</sub>]** was used in place of ***cis*-[Pt(DPS)Cl<sub>2</sub>]**. Subsequent recrystallization from vapour diffusion of *n*-pentane into a dichloromethane solution of **2** gave pale yellow crystals. Yield: 41 mg, 64%. <sup>1</sup>H NMR (CD<sub>2</sub>Cl<sub>2</sub>, 400 MHz): δ 9.30 (dd, *J* = 5.5, 0.9 Hz, 2H), 8.18 (td, *J* = 7.8, 1.6 Hz, 2H), 8.12–8.07 (m, 2H), 7.56 (ddd, *J* = 7.2, 5.4, 1.5 Hz, 2H), 7.37–7.29 (m, 4H), 7.25–7.17 (m, 4H), 7.16–7.09 (m, 2H). <sup>13</sup>C{<sup>1</sup>H} NMR (CD<sub>2</sub>Cl<sub>2</sub>, 100 MHz): δ 160.96, 154.49, 140.69, 132.16, 128.23, 127.83, 127.71, 126.24, 122.21, 101.63, 81.24. IR (solid) ν/cm<sup>-1</sup>: 2117, 2131 ν(C≡C). HR-ESI MS *m/z* calcd C<sub>26</sub>H<sub>19</sub>N<sub>2</sub>OPtS [M+H]<sup>+</sup>: 602.0866; found, 602.0860.

***cis*-[Pt(DPSO<sub>2</sub>)(C≡CPh)<sub>2</sub>] (3)**: The complex was prepared according to a procedure similar to that for **1**, except ***cis*-[Pt(DPSO<sub>2</sub>)Cl<sub>2</sub>]** was used in place of ***cis*-[Pt(DPS)Cl<sub>2</sub>]**. Yield: 21 mg, 33%. <sup>1</sup>H NMR (CD<sub>2</sub>Cl<sub>2</sub>, 400 MHz): δ 9.73 (dd, *J* = 5.7, 1.2 Hz, 2H), 8.45 (dd, *J* = 7.9, 0.8 Hz, 2H), 8.28 (td, *J* = 7.9, 1.6 Hz, 2H), 7.77 (ddd, *J* = 7.8, 5.5, 1.5 Hz, 2H), 7.39 (dd, *J* = 8.2, 1.3 Hz, 4H), 7.29–7.21 (m, 4H), 7.19–7.12 (m, 2H). <sup>13</sup>C{<sup>1</sup>H} NMR (CD<sub>2</sub>Cl<sub>2</sub>, 100 MHz): δ 156.47, 152.27,

140.79, 132.30, 130.92, 128.26, 127.85, 126.29, 125.99, 101.10, 78.75. IR (solid)  $\nu/\text{cm}^{-1}$ : 2120, 2133(sh)  $\nu(\text{C}\equiv\text{C})$ . HR-ESI MS  $m/z$  calcd  $\text{C}_{26}\text{H}_{19}\text{N}_2\text{O}_2\text{PtS}$   $[\text{M}+\text{H}]^+$ : 618.0815; found, 618.0804.

***cis*-[Pt(MeDPS)(C≡CPh)<sub>2</sub>] (4)**: The complex was prepared according to a procedure similar to that for **1**, except ***cis*-[Pt(MeDPS)Cl<sub>2</sub>]** was used in place of ***cis*-[Pt(DPS)Cl<sub>2</sub>]**. Yield: 39 mg, 61%. <sup>1</sup>H NMR (CD<sub>2</sub>Cl<sub>2</sub>, 400 MHz):  $\delta$  9.23 (dd,  $J = 5.8\text{Hz}$ , 2H), 7.73–7.64 (m, 2H), 7.42–7.30 (m, 4H), 7.27–7.17 (m, 6H), 7.15–7.07 (m, 2H), 2.38 (s, 6H). <sup>13</sup>C{<sup>1</sup>H} NMR (CD<sub>2</sub>Cl<sub>2</sub>, 100 MHz):  $\delta$  154.79, 152.33, 151.46, 132.11, 129.65, 128.43, 128.16, 126.68, 125.77, 100.46, 83.25. IR (solid)  $\nu/\text{cm}^{-1}$ : 2113, 2125  $\nu(\text{C}\equiv\text{C})$ . HR-ESI MS  $m/z$  calcd  $\text{C}_{28}\text{H}_{23}\text{N}_2\text{OPtS}$   $[\text{M}+\text{H}]^+$ : 614.1230; found, 614.1226.

***cis*-[Pt(MeDPSO)(C≡CPh)<sub>2</sub>] (5)**: The complex was prepared according to a procedure similar to that for **1**, except ***cis*-[Pt(MeDPSO)Cl<sub>2</sub>]** was used in place of ***cis*-[Pt(DPS)Cl<sub>2</sub>]**. Subsequent recrystallization from vapour diffusion of *n*-pentane into a 1,2-dichloroethane solution of **5** gave pale yellow crystals. Yield: 39 mg, 62%. <sup>1</sup>H NMR (CD<sub>2</sub>Cl<sub>2</sub>, 400 MHz):  $\delta$  9.12 (d,  $J = 5.6\text{Hz}$ , 2H), 7.91 (s, 2H), 7.39–7.32 (m, 6H), 7.26–7.19 (m, 4H), 7.17–7.10 (m, 2H), 2.49 (s, 6H). <sup>13</sup>C{<sup>1</sup>H} NMR (CD<sub>2</sub>Cl<sub>2</sub>, 100 MHz):  $\delta$  160.20, 153.91, 153.68, 132.13, 128.53, 128.19, 127.85, 126.11, 122.55, 101.33, 81.85, 21.99. IR (solid)  $\nu/\text{cm}^{-1}$ : 2109, 2128  $\nu(\text{C}\equiv\text{C})$ . HR-ESI MS  $m/z$  calcd  $\text{C}_{28}\text{H}_{22}\text{N}_2\text{OPtSNa}$   $[\text{M}+\text{Na}]^+$ : 652.0998; found, 652.0993.

***cis*-[Pt(MeDPSO<sub>2</sub>)(C≡CPh)<sub>2</sub>] (6)**: The complex was prepared according to a procedure similar to that for **1**, except ***cis*-[Pt(MeDPSO<sub>2</sub>)Cl<sub>2</sub>]** was used in place of ***cis*-[Pt(DPS)Cl<sub>2</sub>]**. Subsequent recrystallization from vapour diffusion of *n*-pentane into a 1,2-dichloroethane solution of **6** gave pale yellow crystals. Yield: 28 mg, 45%. <sup>1</sup>H NMR (CD<sub>2</sub>Cl<sub>2</sub>, 400 MHz):  $\delta$  9.51 (d,  $J = 5.5\text{Hz}$ , 2H), 8.24 (d,  $J = 1.9\text{Hz}$ , 2H), 7.54 (dd,  $J = 5.7, 1.1\text{Hz}$ , 2H), 7.38 (m, 4H), 7.23 (t,  $J = 7.5\text{Hz}$ , 4H), 7.15 (m, 2H), 2.50 (s, 6H). <sup>13</sup>C{<sup>1</sup>H} NMR (CD<sub>2</sub>Cl<sub>2</sub>, 100 MHz):  $\delta$  155.56, 154.07, 151.52,

132.21, 131.32, 128.19, 127.94, 126.49, 126.11, 100.66, 79.51, 21.96. IR (solid)  $\nu/\text{cm}^{-1}$ : 2121, 2135  $\nu(\text{C}\equiv\text{C})$ . HR-ESI MS  $m/z$  calcd  $\text{C}_{28}\text{H}_{23}\text{N}_2\text{O}_2\text{PtS}$   $[\text{M}+\text{H}]^+$ : 646.1119; found, 646.1128.

**PMMA Film Fabrication.** A solution of PMMA (98 mg) and the respective platinum complex (2 mg, 2 wt%) in dichloromethane (1 mL) was prepared. The solution was drop-coated onto a quartz plate and then dried overnight at room temperature prior to use.

**Physical Measurements and Instrumentation.**  $^1\text{H}$  NMR spectra were collected using a Bruker AV-400 (400 MHz) spectrometer at room temperature and referenced to the residual protonated solvent peak. NMR solvent from Cambridge Isotope Laboratories was used as received. Infrared spectroscopy was performed on an attenuated total reflection (ATR) crystal using a PerkinElmer Frontier FT-IR spectrometer. High-resolution electrospray ionization (HR-ESI) mass spectrometry data were obtained on a Waters/Micromass LCT TOF-MS spectrometer. HPLC grade solvents were used for spectroscopic analysis. Thermogravimetric analysis (TGA) was performed on a Netzsch TGA209 F1 Libra thermogravimetric analyzer under  $\text{N}_2$ , samples were heated from 30 to 600  $^\circ\text{C}$  at the rate of 10  $^\circ\text{C}/\text{min}$ . Electronic absorption spectra were obtained on a Varian-Cary 5000 UV-vis-near-IR spectrophotometer. Photoluminescence spectra at room temperature were collected using an Edinburgh Instrument FLS100 spectrofluorometer. Solution samples were maintained under a blanket of Ar for the duration of the measurements in 1  $\text{cm}^2$  quartz cells (Starna Cells) fitted with a rubber septum. Measurements of the 2-MeTHF glass samples at 77 K were carried with the solutions in a quartz tube inside a liquid nitrogen filled quartz optical Dewar flask fitted to an Edinburgh Instrument FLS1000 spectrofluorometer. Emission lifetime data were obtained using a Horiba Yvon Fluorocube TCSPC apparatus using a 375 nm laser excitation source with a 400 nm long-pass filter between sample and detector. Lifetime data were fitted against the laser source background using the DAS6 Data Analysis software package. The photoluminescence quantum yields of the solution state samples were measured using the

method by Demas and Crosby using quinine sulfate in 0.1 M aqueous sulfuric acid ( $\Phi_{em} = 0.54$ ) as a reference standard.<sup>3</sup> Photoluminescence quantum yields of the solid-state samples were determined using an Edinburgh Instruments barium sulfate coated integrating sphere fitted in a FS5 spectrofluorometer. Cyclic voltammetric measurements were performed on a CHI 660D potentiostat with a 3-electrode configuration using a platinum working electrode, silver wire pseudo-reference electrode and platinum mesh counter electrode. The electrochemical measurements were performed in acetonitrile solution with 0.1 M  ${}^n\text{Bu}_4\text{NPF}_6$  as electrolyte and 0.1 mM of each complex. The solution was degassed with Ar and a scan rate of  $100 \text{ mVs}^{-1}$  was used in all cases. Potentials were referenced to  $\text{Fc}/\text{Fc}^+$  with the addition of ferrocene at the end of each experiment.

**X-ray Crystallography.** Single crystal diffraction data were collected using a Bruker APEX DUO diffractometer with graphite monochromated Mo  $K\alpha$  radiation ( $\lambda = 0.71073 \text{ \AA}$ ) at 100 K. Raw frame data were processed using APEX3. The program SAINT<sup>4</sup> was used to reduce the data and the program SADABS<sup>5</sup> was used to make corrections to the empirical absorptions. Space group assignments were made using XPREP on all compounds. The structures were solved in the Olex2<sup>6</sup> suite of programs using Intrinsic Phasing and refined using full-matrix least-squares/difference Fourier techniques on F2 using SHELXL.<sup>7</sup> All non-hydrogen atoms were refined anisotropically. Diagrams and publications materials were generated using ORTEP-3, Mercury and PLATON.

**Theoretical methods.** Geometry optimizations for complexes **1–6** were carried out using density functional theory (DFT) in vacuum with the Orca 5.0.2 software package<sup>8</sup> and the images of the complexes were obtained using the GaussView 6 program. The PBE0 functional<sup>9</sup> with basis set SARC-ZORA-TZVP for Pt(II) atom, and the Def2-TZVP(-f) for the other atoms was employed to optimize the geometry of the ground states ( $S_0$ ) and lowest-energy triplet states ( $T_1$ ), using the scalar-relativistic method ZORA to account for relativistic effects.<sup>10</sup> Grimme's dispersion

correction with damping D3BJ and the resolution of identity approximation for the Coulomb part, with the corresponding auxiliary basis, were also included.<sup>11</sup> Analytical harmonic vibrational frequency calculations were performed to confirm that the ground state represents the lowest energy point on the potential energy surface. Time-dependent density functional theory (TD-DFT)<sup>12</sup> was employed to obtain the first 50 singlet excited states while also incorporating a solvent correction with a continuous polarizability model method (CPCM).<sup>13</sup> Quasi-degenerate perturbation theory was utilized to conduct the SOC calculations in addition to the TD-DFT results.<sup>14</sup>



## NMR Spectra

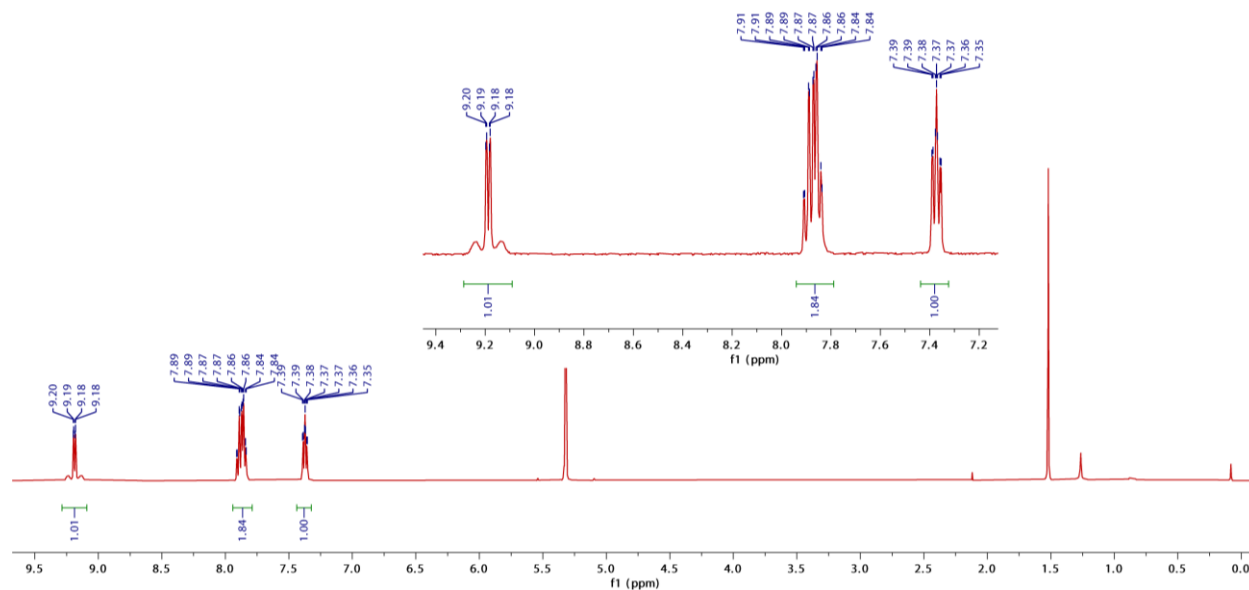

Figure S1.  $^1\text{H}$  NMR spectrum of  $[\text{Pt}(\text{DPS})\text{Cl}_2]$  in  $\text{CD}_2\text{Cl}_2$ .

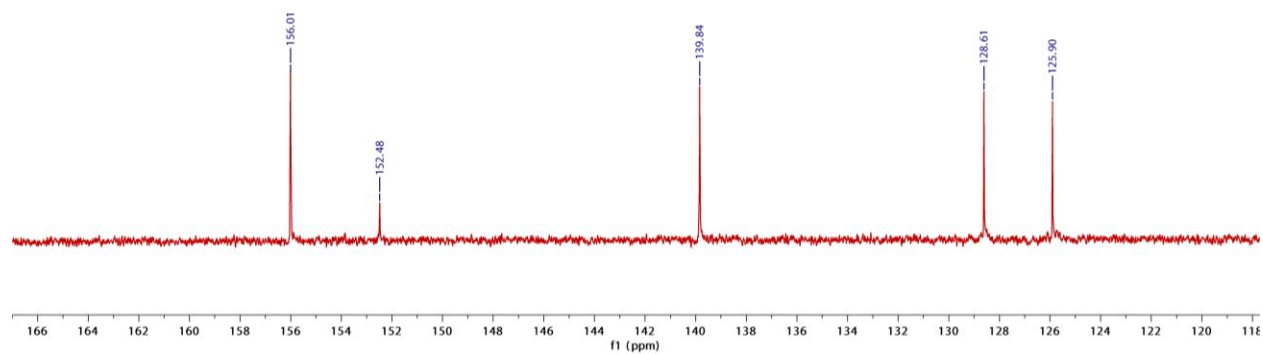

Figure S2.  $^{13}\text{C}\{^1\text{H}\}$  NMR spectrum of  $[\text{Pt}(\text{DPS})\text{Cl}_2]$  in  $\text{CD}_2\text{Cl}_2$ .

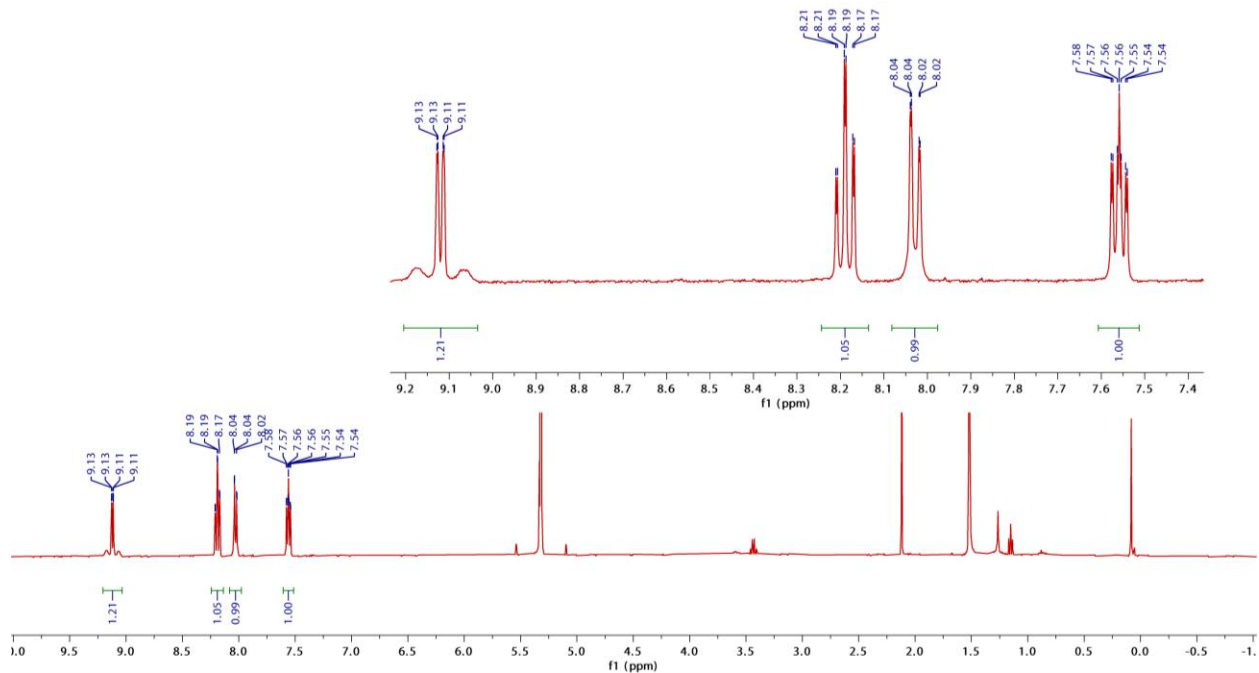

**Figure S3.**  $^1\text{H}$  NMR spectrum of  $[\text{Pt}(\text{DPSO})\text{Cl}_2]$  in  $\text{CD}_2\text{Cl}_2$ .

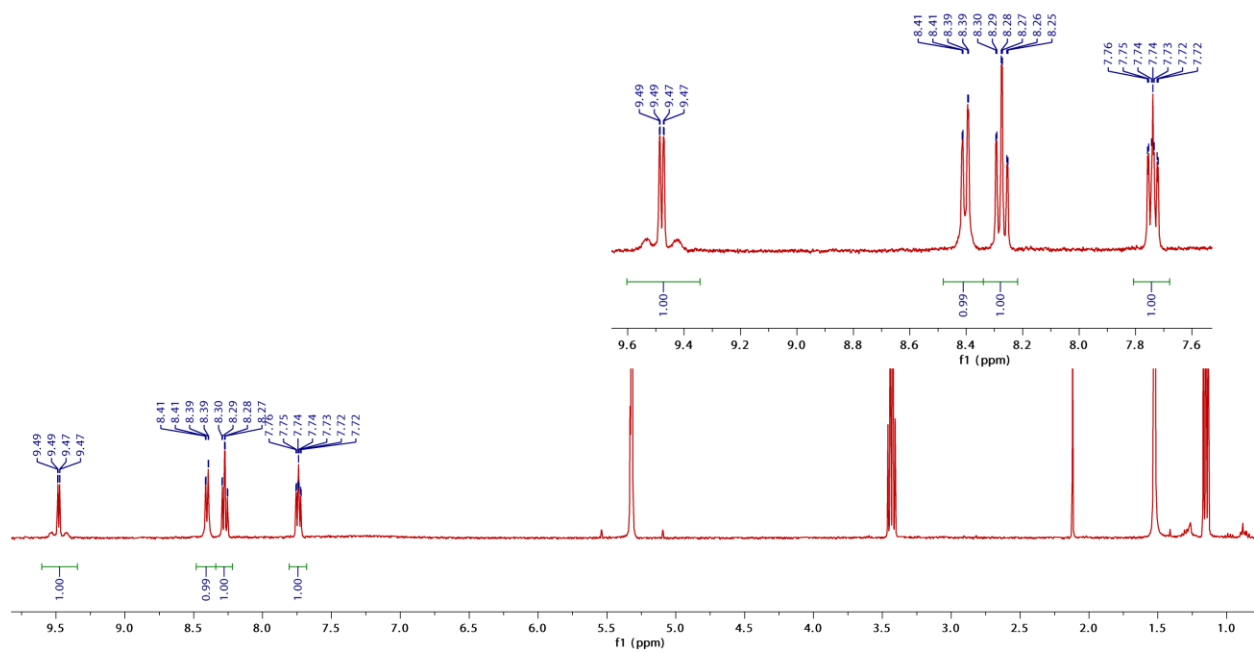

**Figure S4.**  $^1\text{H}$  NMR spectrum of  $[\text{Pt}(\text{DPSO}_2)\text{Cl}_2]$  in  $\text{CD}_2\text{Cl}_2$ .

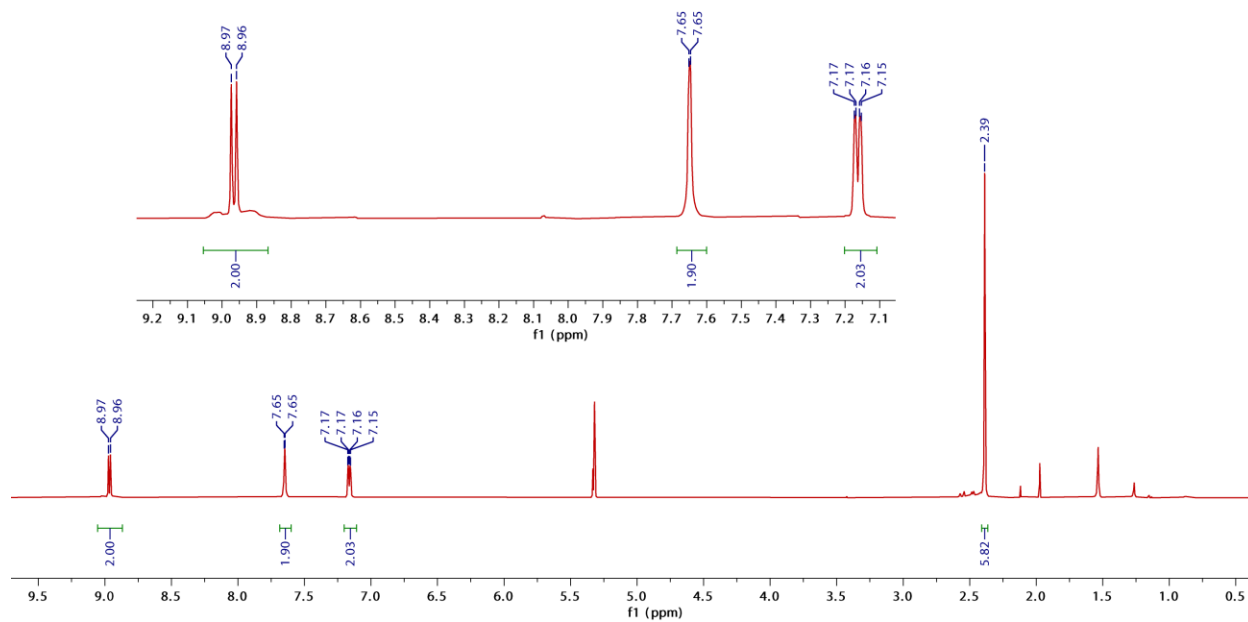

**Figure S5.**  $^1\text{H}$  NMR spectrum of  $[\text{Pt}(\text{MeDPS})\text{Cl}_2]$  in  $\text{CD}_2\text{Cl}_2$ .

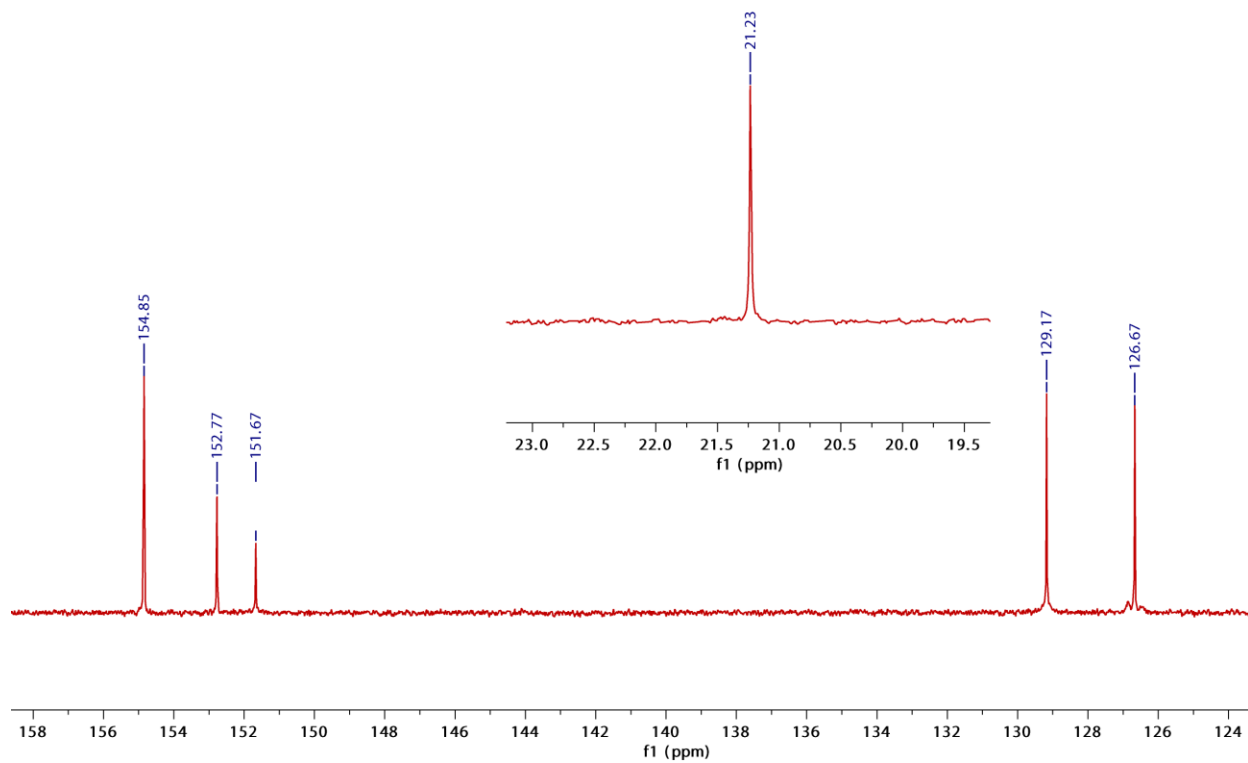

**Figure S6.**  $^{13}\text{C}\{^1\text{H}\}$  NMR spectrum of  $[\text{Pt}(\text{MeDPS})\text{Cl}_2]$  in  $\text{CD}_2\text{Cl}_2$ .

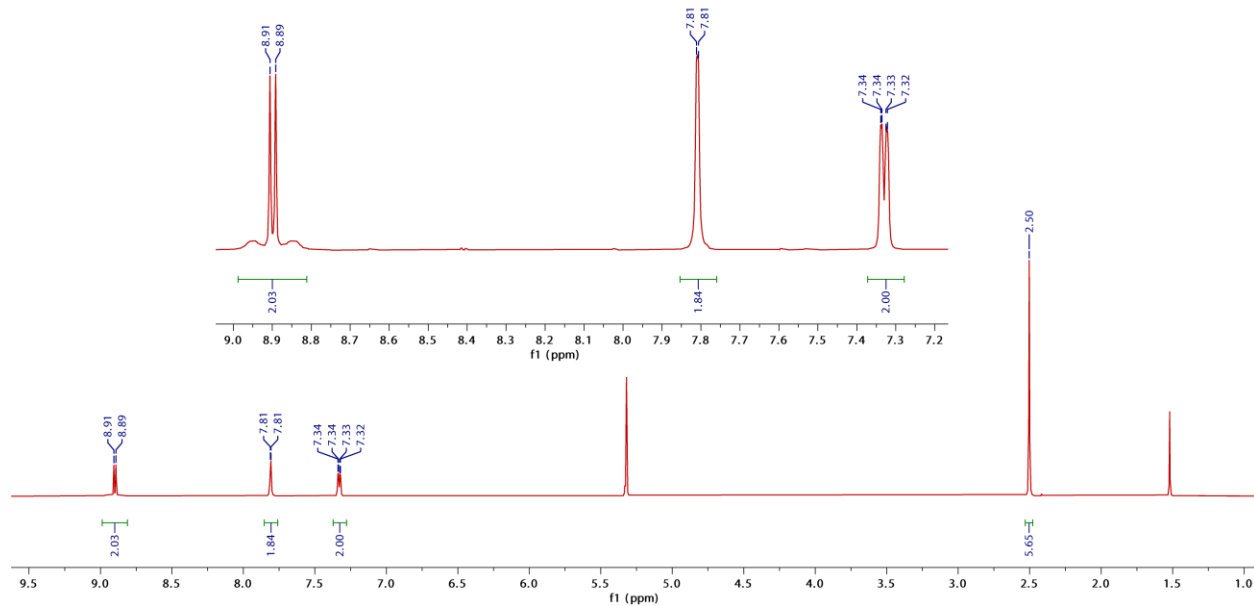

**Figure S7.** <sup>1</sup>H NMR spectrum of [Pt(MeDPSO)Cl<sub>2</sub>] in CD<sub>2</sub>Cl<sub>2</sub>.

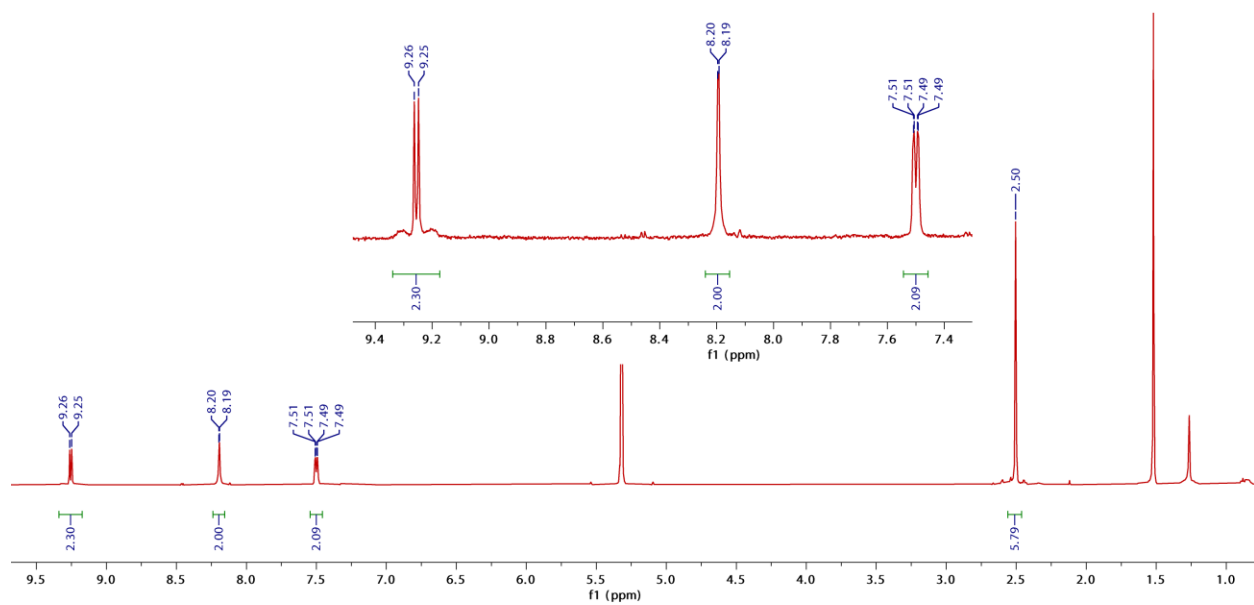

**Figure S8.** <sup>1</sup>H NMR spectrum of [Pt(MeDPSO<sub>2</sub>)Cl<sub>2</sub>] in CD<sub>2</sub>Cl<sub>2</sub>.

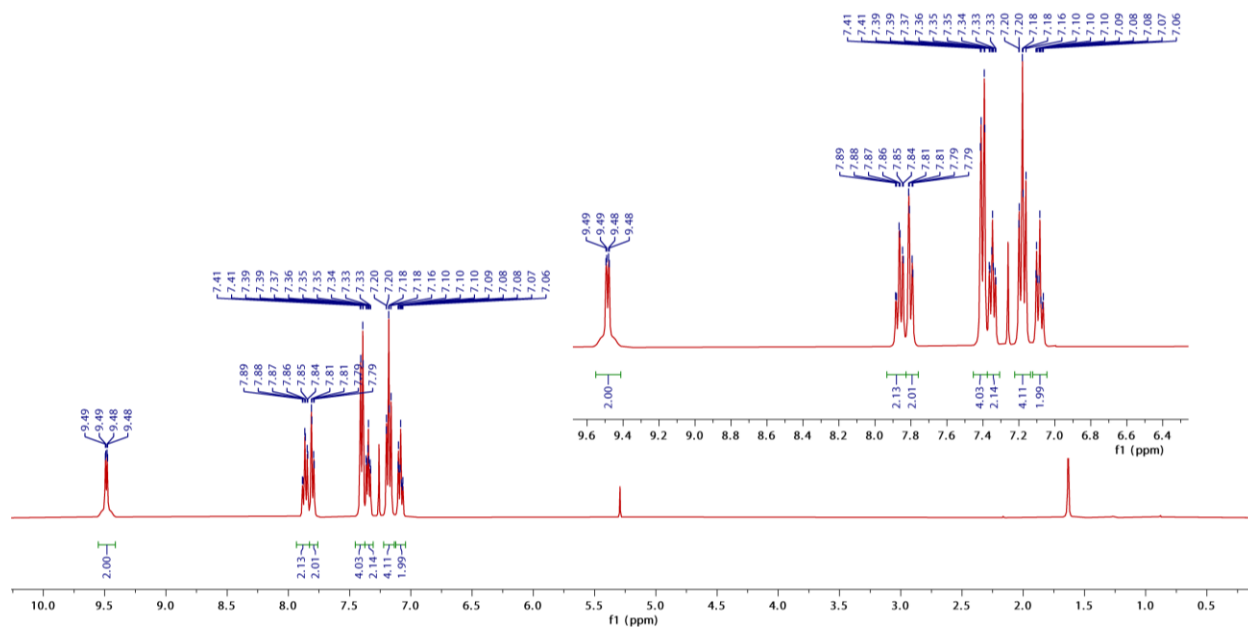

Figure S9.  $^1\text{H}$  NMR spectrum of 1 in  $\text{CDCl}_3$ .

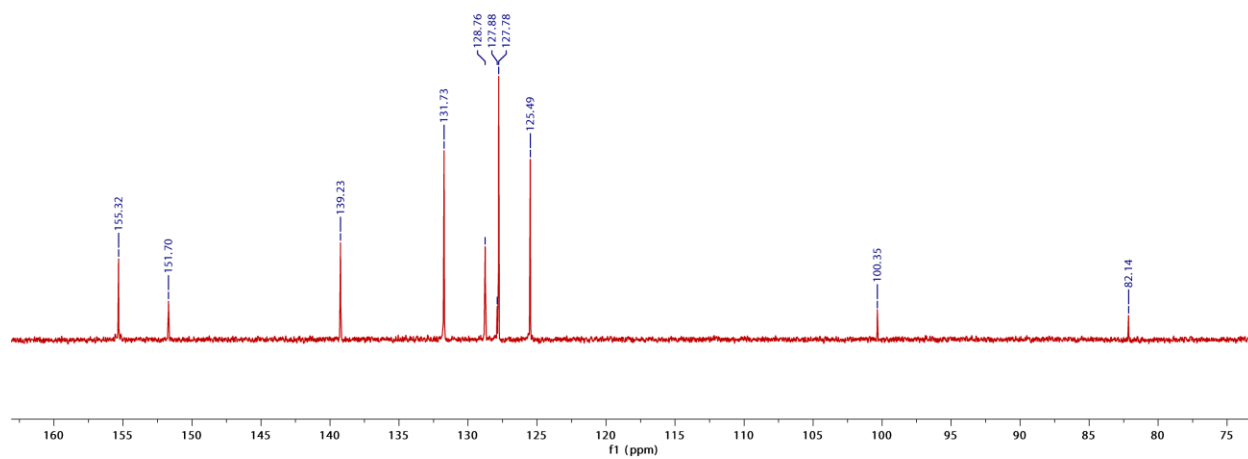

Figure S10.  $^{13}\text{C}\{^1\text{H}\}$  NMR spectrum of 1 in  $\text{CD}_2\text{Cl}_2$ .

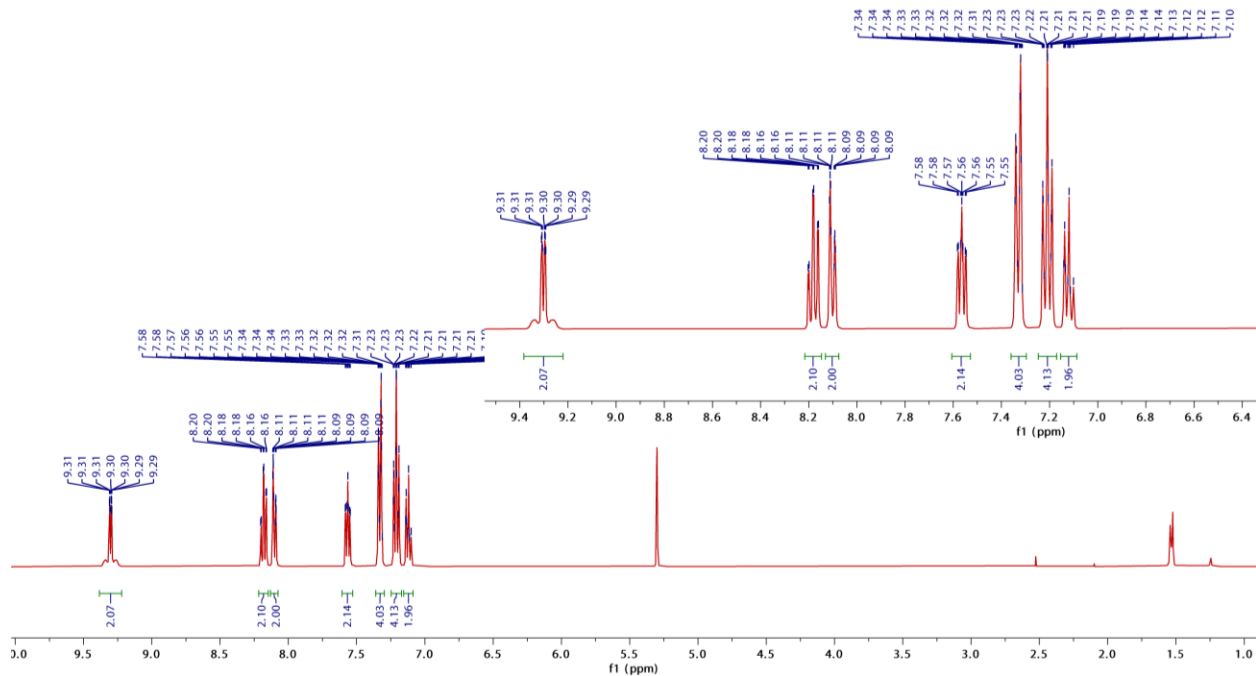

Figure S11.  $^1\text{H}$  NMR spectrum of **2** in  $\text{CD}_2\text{Cl}_2$ .

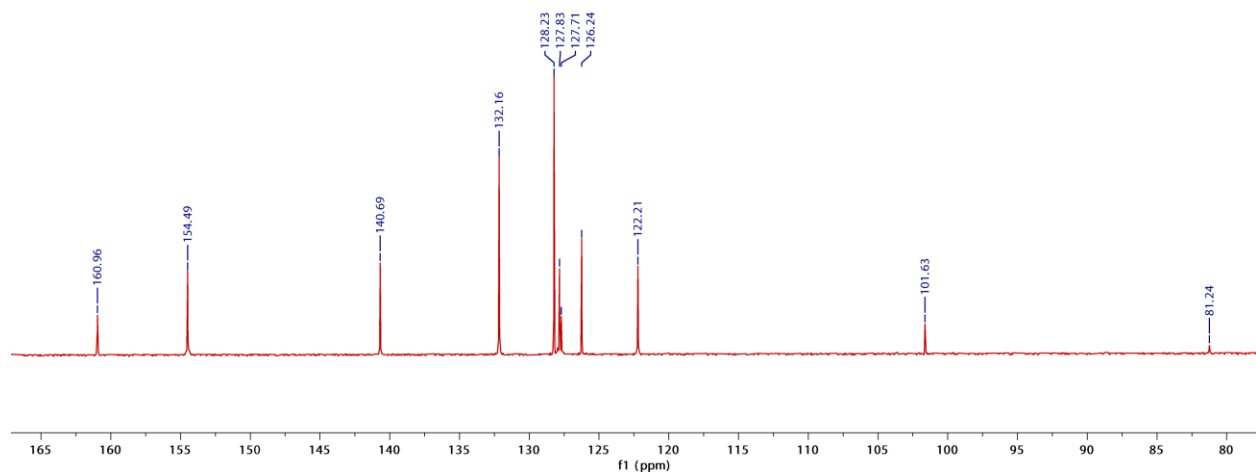

Figure S12.  $^{13}\text{C}\{^1\text{H}\}$  NMR spectrum of **2** in  $\text{CD}_2\text{Cl}_2$ .

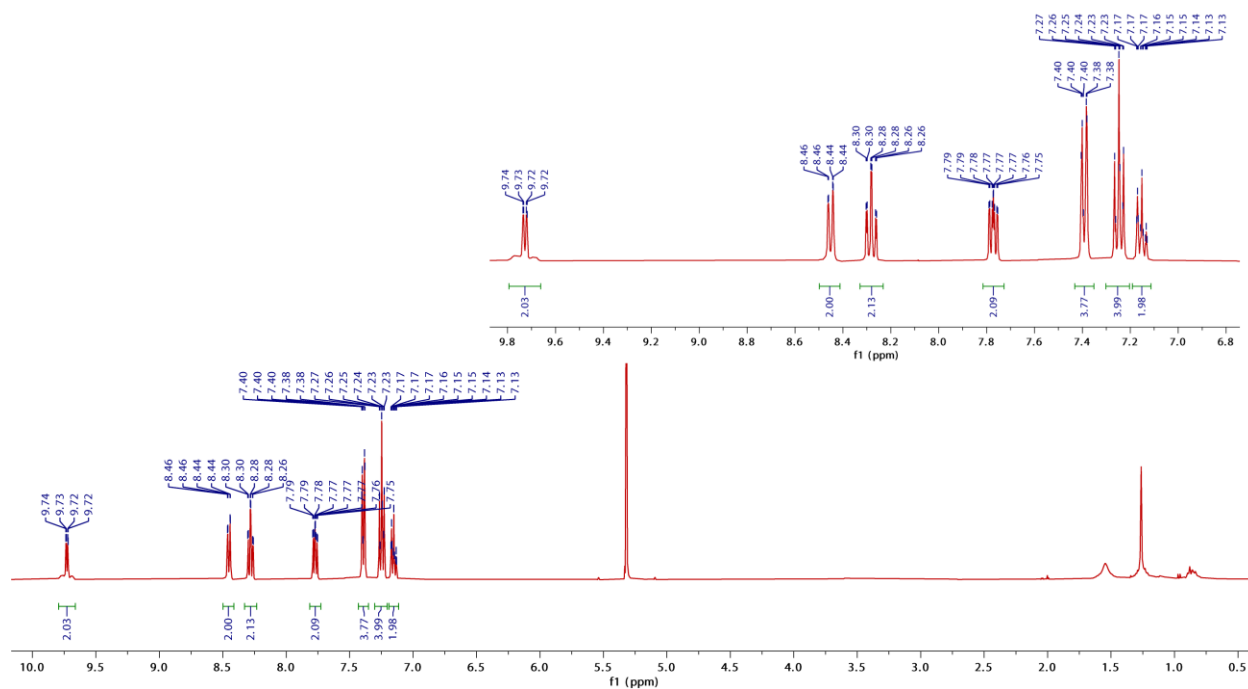

Figure S13.  $^1\text{H}$  NMR spectrum of **3** in  $\text{CD}_2\text{Cl}_2$ .

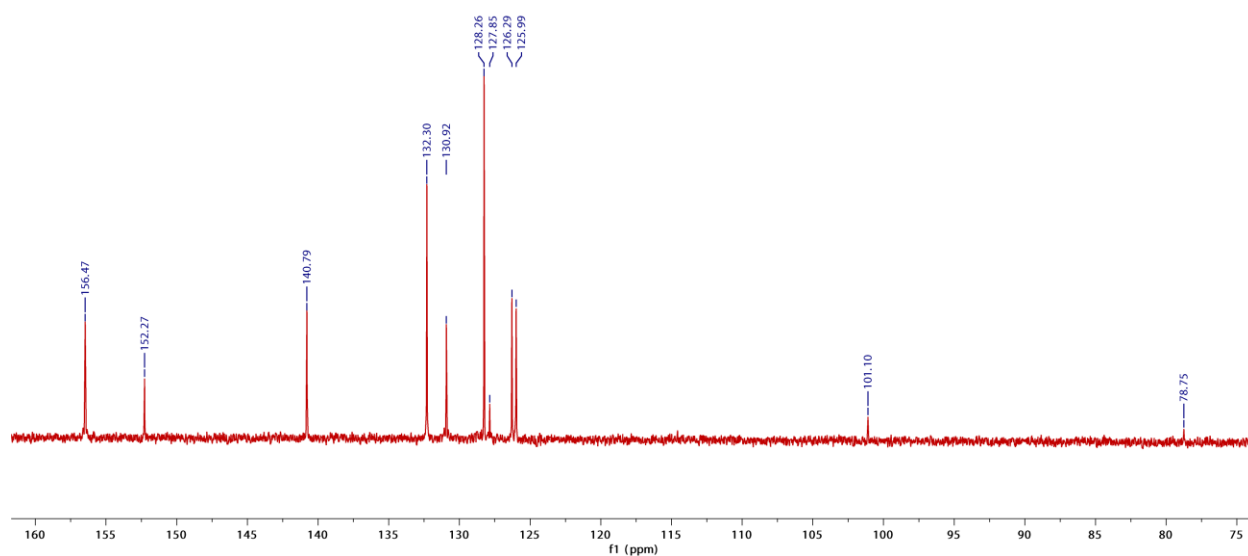

Figure S14.  $^{13}\text{C}\{^1\text{H}\}$  NMR spectrum of **3** in  $\text{CD}_2\text{Cl}_2$ .

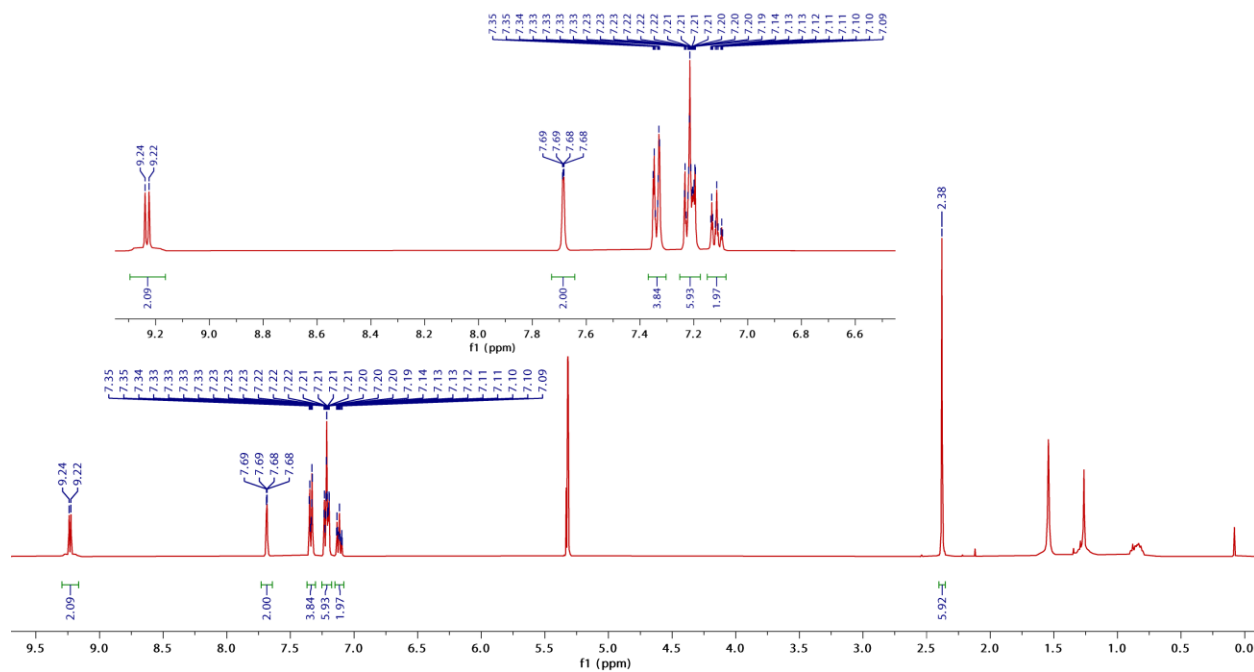

Figure S15.  $^1\text{H}$  NMR spectrum of **4** in  $\text{CD}_2\text{Cl}_2$ .

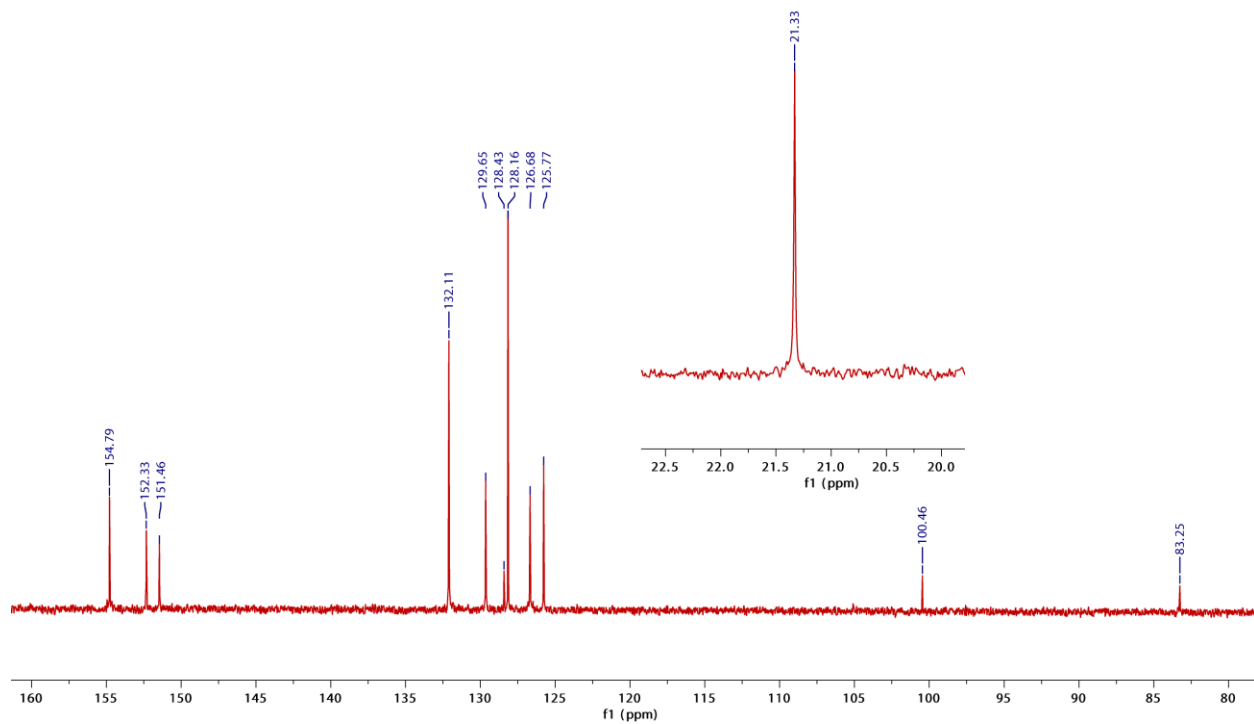

Figure S16.  $^{13}\text{C}\{^1\text{H}\}$  NMR spectrum of **4** in  $\text{CD}_2\text{Cl}_2$ .



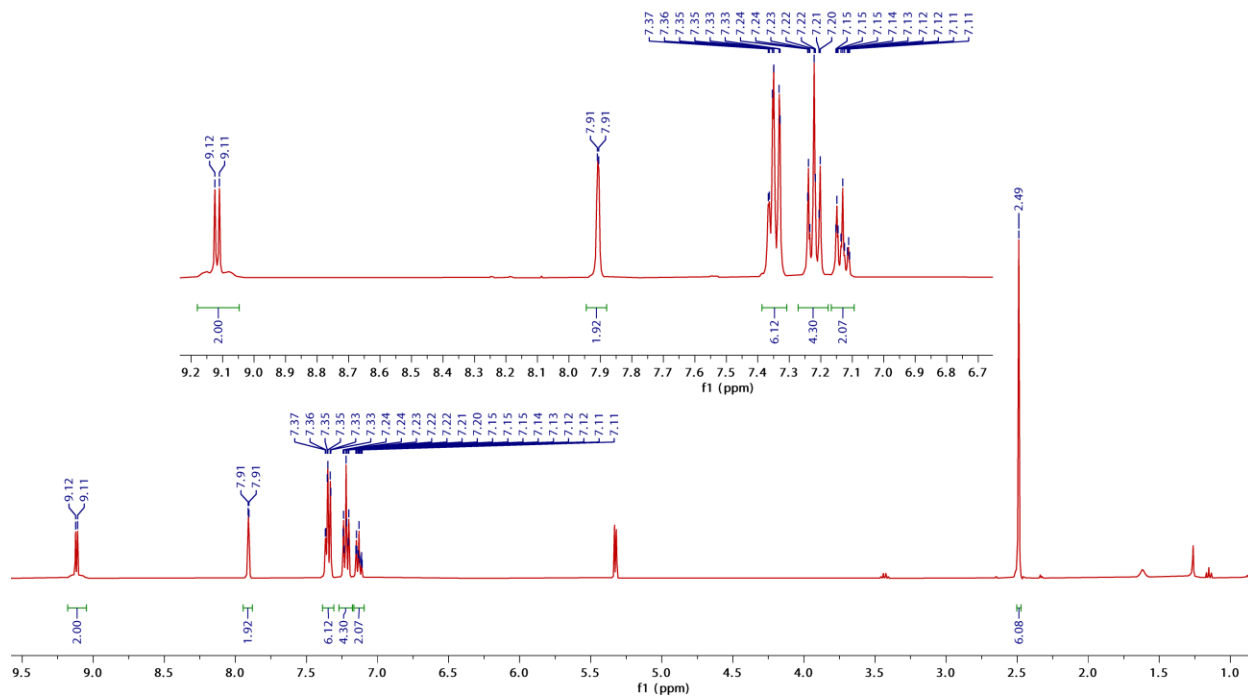

**Figure S17.**  $^1\text{H}$  NMR spectrum of **5** in  $\text{CD}_2\text{Cl}_2$ .

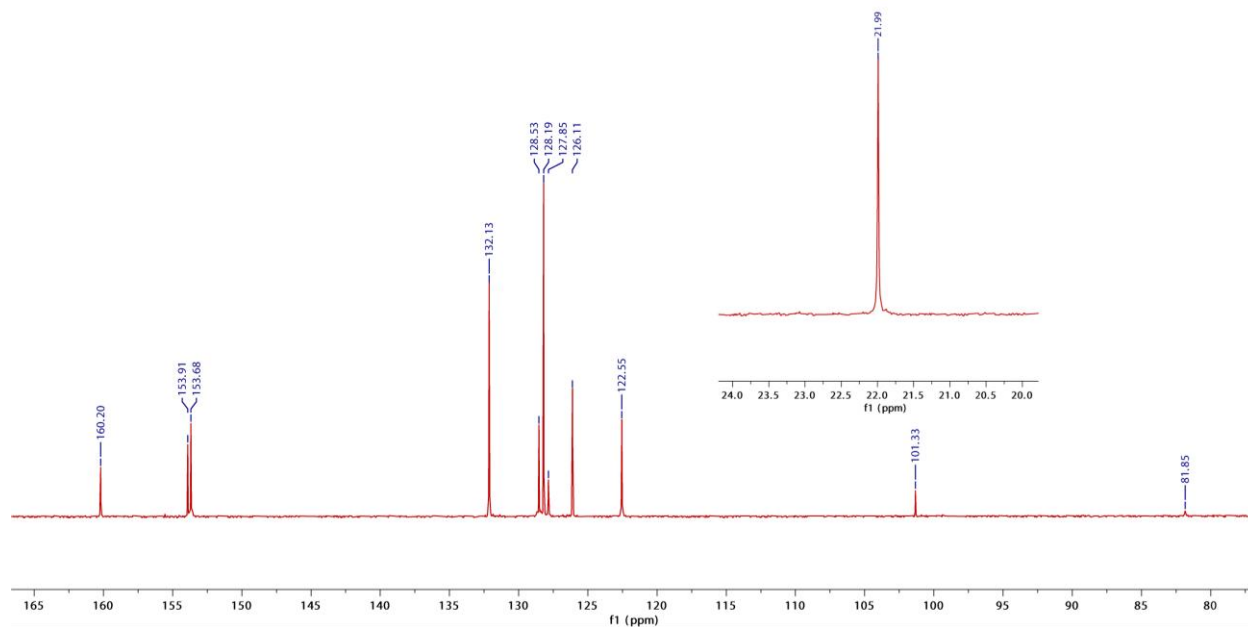

**Figure S18.**  $^{13}\text{C}\{^1\text{H}\}$  NMR spectrum of **5** in  $\text{CD}_2\text{Cl}_2$ .

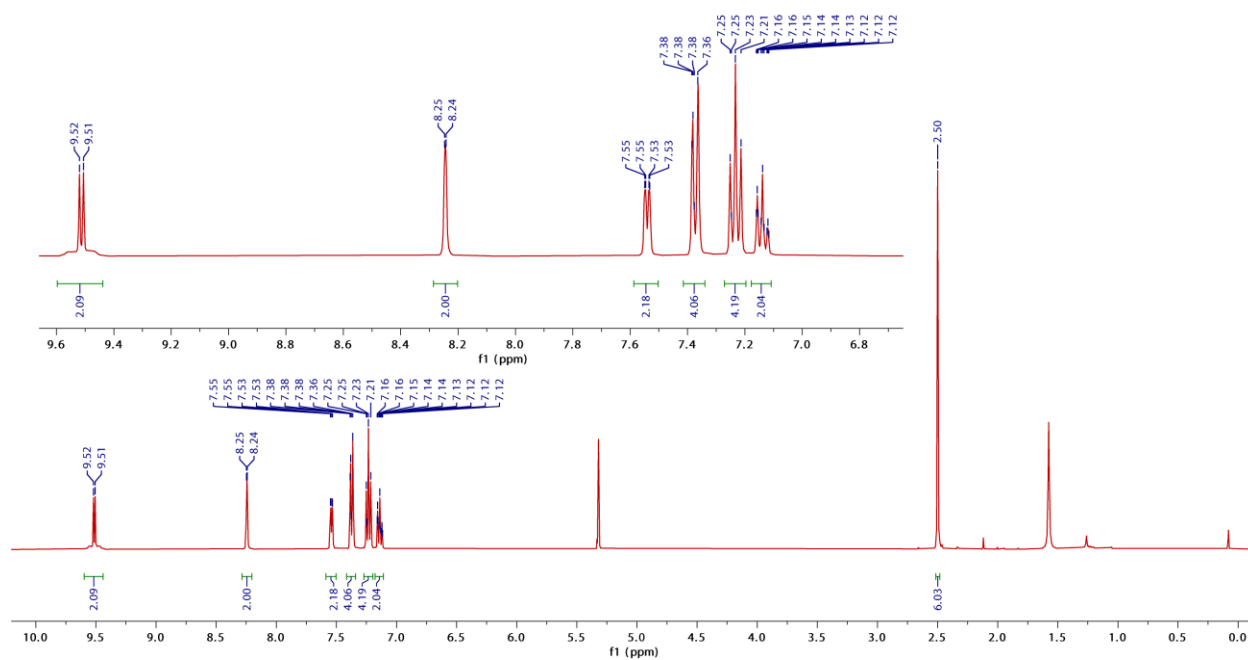

Figure S19.  $^1\text{H}$  NMR spectrum of **6** in  $\text{CD}_2\text{Cl}_2$ .

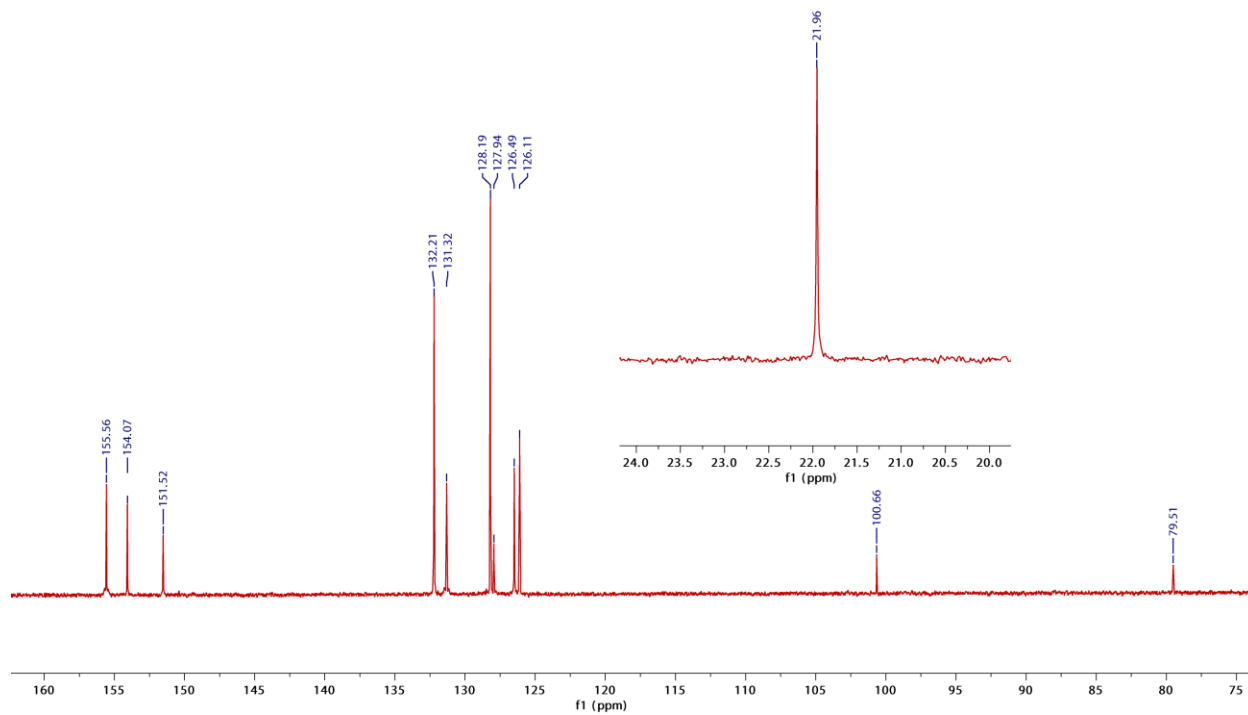

Figure S20.  $^{13}\text{C}\{^1\text{H}\}$  NMR spectrum of **6** in  $\text{CD}_2\text{Cl}_2$ .

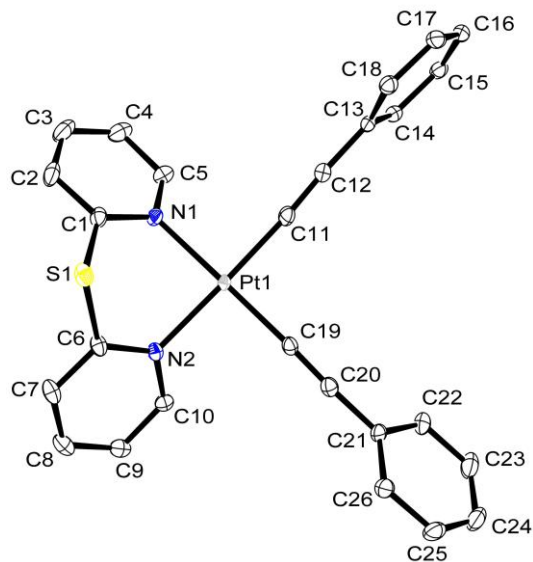

**Figure S21.** Crystal structure of complex **1**. Ellipsoids are plotted at the 50% probability level, and H atoms are removed for clarity.

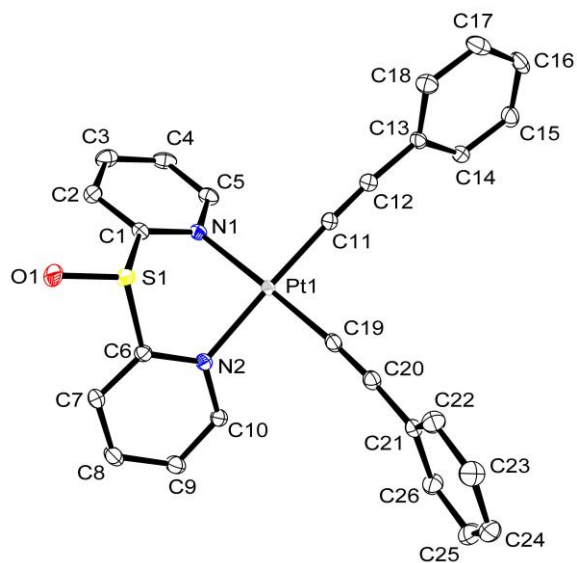

**Figure S22.** Crystal structure of complex **2**. Ellipsoids are plotted at the 50% probability level, and H atoms are removed for clarity.

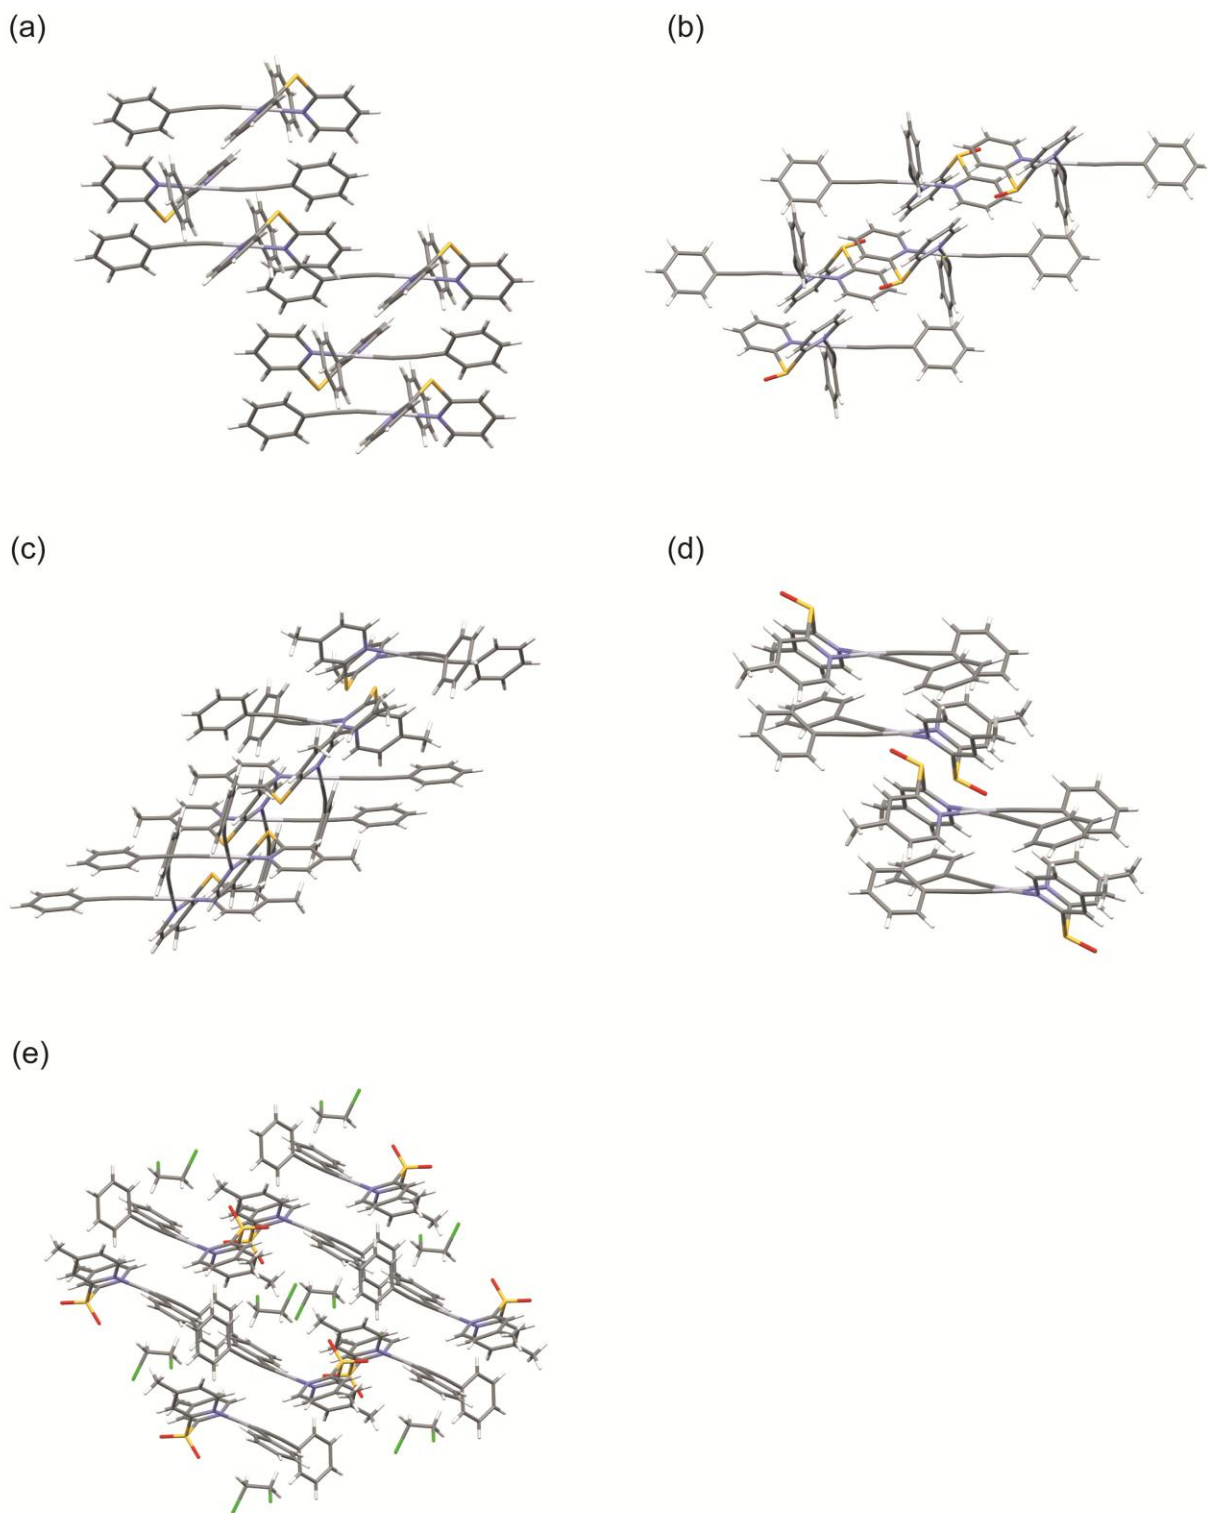

**Figure S23.** Molecular packing of the complexes (a) **1**, (b) **2**, (c) **4**, (d) **5** and (e) **6**.

**Table S1.** Crystal and structure determination data for **1**.

|                                                            |                                                                                                   |
|------------------------------------------------------------|---------------------------------------------------------------------------------------------------|
| Formula                                                    | C <sub>26</sub> H <sub>18</sub> N <sub>2</sub> PtS                                                |
| Molecular weight                                           | 585.57                                                                                            |
| <i>T</i> / K                                               | 100                                                                                               |
| <i>a</i> / Å                                               | 11.2341(5)                                                                                        |
| <i>b</i> / Å                                               | 13.2688(6)                                                                                        |
| <i>c</i> / Å                                               | 17.1255(8)                                                                                        |
| $\alpha$ / deg                                             | 67.6220(10)                                                                                       |
| $\beta$ / deg                                              | 89.7200(10)                                                                                       |
| $\gamma$ / deg                                             | 65.4480(10)                                                                                       |
| <i>V</i> / Å <sup>3</sup>                                  | 2111.14(17)                                                                                       |
| Crystal color                                              | yellow                                                                                            |
| Crystal system                                             | triclinic                                                                                         |
| Space group                                                | P $\bar{1}$                                                                                       |
| <i>Z</i>                                                   | 4                                                                                                 |
| <i>F</i> (000)                                             | 1128                                                                                              |
| <i>D</i> <sub>c</sub> / gcm <sup>-3</sup>                  | 1.842                                                                                             |
| Crystal dimensions / mm                                    | 0.37 × 0.29 × 0.21                                                                                |
| $\lambda$ / Å                                              | 0.71073                                                                                           |
| $\mu$ / mm <sup>-1</sup>                                   | 6.761                                                                                             |
| Collection range                                           | 1.308 ≤ $\theta$ ≤ 30.664°<br>( <i>h</i> : -16 to 16; <i>k</i> : -19 to 15; <i>l</i> : -24 to 24) |
| Completeness to theta                                      | 0.996                                                                                             |
| No. of data collected                                      | 84801                                                                                             |
| No. of unique data                                         | 13013                                                                                             |
| No. of data used in refinement, <i>m</i>                   | 11810                                                                                             |
| No. of parameters refined, <i>p</i>                        | 541                                                                                               |
| <i>R</i>                                                   | 0.0139                                                                                            |
| <i>wR</i>                                                  | 0.0304                                                                                            |
| Goodness-of-fit, <i>S</i>                                  | 1.041                                                                                             |
| Maximum shift, ( $\Delta/\sigma$ ) <sub>max</sub>          | 0.007                                                                                             |
| Residual extrema in final difference map, eÅ <sup>-3</sup> | +0.857, -0.842                                                                                    |

**Table S2.** Crystal and structure determination data for complex **2**.

|                                                            |                                                                                                 |
|------------------------------------------------------------|-------------------------------------------------------------------------------------------------|
| Formula                                                    | C <sub>26</sub> H <sub>18</sub> N <sub>2</sub> OPtS                                             |
| Molecular weight                                           | 601.57                                                                                          |
| <i>T</i> / K                                               | 100                                                                                             |
| <i>a</i> / Å                                               | 7.9676(5)                                                                                       |
| <i>b</i> / Å                                               | 11.9940(7)                                                                                      |
| <i>c</i> / Å                                               | 12.5963(7)                                                                                      |
| $\alpha$ / deg                                             | 117.4240(10)                                                                                    |
| $\beta$ / deg                                              | 97.964(2)                                                                                       |
| $\gamma$ / deg                                             | 90.392(2)                                                                                       |
| <i>V</i> / Å <sup>3</sup>                                  | 1054.74(11)                                                                                     |
| Crystal color                                              | yellow                                                                                          |
| Crystal system                                             | triclinic                                                                                       |
| Space group                                                | P $\bar{1}$                                                                                     |
| <i>Z</i>                                                   | 2                                                                                               |
| <i>F</i> (000)                                             | 580                                                                                             |
| <i>D</i> <sub>c</sub> / gcm <sup>-3</sup>                  | 1.894                                                                                           |
| Crystal dimensions / mm                                    | 0.12 × 0.06 × 0.02                                                                              |
| $\lambda$ / Å                                              | 0.71073                                                                                         |
| $\mu$ / mm <sup>-1</sup>                                   | 6.772                                                                                           |
| Collection range                                           | 1.845 ≤ $\theta$ ≤ 33.319°<br>( <i>h</i> : -12 to 12; <i>k</i> : -18 to 16; <i>l</i> : 0 to 19) |
| Completeness to theta                                      | 0.922                                                                                           |
| No. of data collected                                      | 7534                                                                                            |
| No. of unique data                                         | 7534                                                                                            |
| No. of data used in refinement, <i>m</i>                   | 6912                                                                                            |
| No. of parameters refined, <i>p</i>                        | 280                                                                                             |
| <i>R</i>                                                   | 0.0191                                                                                          |
| <i>wR</i>                                                  | 0.0396                                                                                          |
| Goodness-of-fit, <i>S</i>                                  | 1.076                                                                                           |
| Maximum shift, ( $\Delta/\sigma$ ) <sub>max</sub>          | 0.004                                                                                           |
| Residual extrema in final difference map, eÅ <sup>-3</sup> | +1.238, -0.790                                                                                  |

**Table S3.** Crystal and structure determination data for complex **4**.

|                                                            |                                                                                                   |
|------------------------------------------------------------|---------------------------------------------------------------------------------------------------|
| Formula                                                    | C <sub>28</sub> H <sub>22</sub> N <sub>2</sub> PtS                                                |
| Molecular weight                                           | 613.62                                                                                            |
| <i>T</i> / K                                               | 100                                                                                               |
| <i>a</i> / Å                                               | 10.8444(10)                                                                                       |
| <i>b</i> / Å                                               | 11.2925(10)                                                                                       |
| <i>c</i> / Å                                               | 18.7020(17)                                                                                       |
| $\alpha$ / deg                                             | 90                                                                                                |
| $\beta$ / deg                                              | 96.706(2)                                                                                         |
| $\gamma$ / deg                                             | 90                                                                                                |
| <i>V</i> / Å <sup>3</sup>                                  | 2274.6(4)                                                                                         |
| Crystal color                                              | yellow                                                                                            |
| Crystal system                                             | monoclinic                                                                                        |
| Space group                                                | P2 <sub>1</sub> /n                                                                                |
| <i>Z</i>                                                   | 4                                                                                                 |
| <i>F</i> (000)                                             | 1192                                                                                              |
| <i>D<sub>c</sub></i> / gcm <sup>-3</sup>                   | 1.792                                                                                             |
| Crystal dimensions / mm                                    | 0.20 × 0.20 × 0.19                                                                                |
| $\lambda$ / Å                                              | 0.71073                                                                                           |
| $\mu$ / mm <sup>-1</sup>                                   | 6.279                                                                                             |
| Collection range                                           | 2.072 ≤ $\theta$ ≤ 30.563°<br>( <i>h</i> : -15 to 15; <i>k</i> : -16 to 16; <i>l</i> : -26 to 26) |
| Completeness to theta                                      | 0.999                                                                                             |
| No. of data collected                                      | 82611                                                                                             |
| No. of unique data                                         | 6980                                                                                              |
| No. of data used in refinement, <i>m</i>                   | 6556                                                                                              |
| No. of parameters refined, <i>p</i>                        | 291                                                                                               |
| <i>R</i>                                                   | 0.0133                                                                                            |
| <i>wR</i>                                                  | 0.0286                                                                                            |
| Goodness-of-fit, <i>S</i>                                  | 1.104                                                                                             |
| Maximum shift, ( $\Delta/\sigma$ ) <sub>max</sub>          | 0.009                                                                                             |
| Residual extrema in final difference map, eÅ <sup>-3</sup> | +0.996, -0.775                                                                                    |

**Table S4.** Crystal and structure determination data for complex **5**.

|                                                            |                                                                                                   |
|------------------------------------------------------------|---------------------------------------------------------------------------------------------------|
| Formula                                                    | C <sub>28</sub> H <sub>22</sub> N <sub>2</sub> OPtS                                               |
| Molecular weight                                           | 629.62                                                                                            |
| <i>T</i> / K                                               | 100                                                                                               |
| <i>a</i> / Å                                               | 9.2869(7)                                                                                         |
| <i>b</i> / Å                                               | 12.7332(9)                                                                                        |
| <i>c</i> / Å                                               | 21.2615(15)                                                                                       |
| $\alpha$ / deg                                             | 89.275(2)                                                                                         |
| $\beta$ / deg                                              | 82.262(2)                                                                                         |
| $\gamma$ / deg                                             | 71.515(2)                                                                                         |
| <i>V</i> / Å <sup>3</sup>                                  | 2361.6(3)                                                                                         |
| Crystal color                                              | yellow                                                                                            |
| Crystal system                                             | triclinic                                                                                         |
| Space group                                                | P $\bar{1}$                                                                                       |
| <i>Z</i>                                                   | 4                                                                                                 |
| <i>F</i> (000)                                             | 1224                                                                                              |
| <i>D<sub>c</sub></i> / gcm <sup>-3</sup>                   | 1.771                                                                                             |
| Crystal dimensions / mm                                    | 0.36 × 0.35 × 0.03                                                                                |
| $\lambda$ / Å                                              | 0.71073                                                                                           |
| $\mu$ / mm <sup>-1</sup>                                   | 6.053                                                                                             |
| Collection range                                           | 0.967 ≤ $\theta$ ≤ 30.667°<br>( <i>h</i> : -13 to 13; <i>k</i> : -18 to 18; <i>l</i> : -30 to 30) |
| Completeness to theta                                      | 0.993                                                                                             |
| No. of data collected                                      | 72022                                                                                             |
| No. of unique data                                         | 14535                                                                                             |
| No. of data used in refinement, <i>m</i>                   | 12825                                                                                             |
| No. of parameters refined, <i>p</i>                        | 599                                                                                               |
| <i>R</i>                                                   | 0.0210                                                                                            |
| <i>wR</i>                                                  | 0.0454                                                                                            |
| Goodness-of-fit, <i>S</i>                                  | 1.036                                                                                             |
| Maximum shift, ( $\Delta/\sigma$ ) <sub>max</sub>          | 0.005                                                                                             |
| Residual extrema in final difference map, eÅ <sup>-3</sup> | +2.423, -0.962                                                                                    |



**Table S5.** Crystal and structure determination data for complex **6**.

|                                                            |                                                                                                                   |
|------------------------------------------------------------|-------------------------------------------------------------------------------------------------------------------|
| Formula                                                    | C <sub>28</sub> H <sub>22</sub> N <sub>2</sub> O <sub>2</sub> PtS • C <sub>2</sub> H <sub>4</sub> Cl <sub>2</sub> |
| Molecular weight                                           | 744.58                                                                                                            |
| <i>T</i> / K                                               | 100                                                                                                               |
| <i>a</i> / Å                                               | 10.5828(8)                                                                                                        |
| <i>b</i> / Å                                               | 26.522(2)                                                                                                         |
| <i>c</i> / Å                                               | 9.9870(8)                                                                                                         |
| $\alpha$ / deg                                             | 90                                                                                                                |
| $\beta$ / deg                                              | 99.343(2)                                                                                                         |
| $\gamma$ / deg                                             | 90                                                                                                                |
| <i>V</i> / Å <sup>3</sup>                                  | 2765.9(4)                                                                                                         |
| Crystal color                                              | yellow                                                                                                            |
| Crystal system                                             | monoclinic                                                                                                        |
| Space group                                                | P2 <sub>1</sub> /c                                                                                                |
| <i>Z</i>                                                   | 4                                                                                                                 |
| <i>F</i> (000)                                             | 1456                                                                                                              |
| <i>D</i> <sub>c</sub> / gcm <sup>-3</sup>                  | 1.788                                                                                                             |
| Crystal dimensions / mm                                    | 0.16 × 0.09 × 0.08                                                                                                |
| $\lambda$ / Å                                              | 0.71073                                                                                                           |
| $\mu$ / mm <sup>-1</sup>                                   | 5.373                                                                                                             |
| Collection range                                           | 1.536 ≤ $\theta$ ≤ 30.592 °<br>( <i>h</i> : -15 to 13; <i>k</i> : -37 to 37; <i>l</i> : -14 to 14)                |
| Completeness to theta                                      | 0.992                                                                                                             |
| No. of data collected                                      | 83311                                                                                                             |
| No. of unique data                                         | 8435                                                                                                              |
| No. of data used in refinement, <i>m</i>                   | 7190                                                                                                              |
| No. of parameters refined, <i>p</i>                        | 345                                                                                                               |
| <i>R</i>                                                   | 0.0229                                                                                                            |
| <i>wR</i>                                                  | 0.0378                                                                                                            |
| Goodness-of-fit, <i>S</i>                                  | 1.058                                                                                                             |
| Maximum shift, ( $\Delta/\sigma$ ) <sub>max</sub>          | 0.003                                                                                                             |
| Residual extrema in final difference map, eÅ <sup>-3</sup> | +1.080, -0.717                                                                                                    |

**Table S6.** Selected bond distances (Å) and angles (°) with estimated standard deviations (esds) in parentheses for **1** and **2**.

| Selected bond lengths (Å) |                   |            |                   |            |
|---------------------------|-------------------|------------|-------------------|------------|
| <b>1</b>                  | Pt(1)–N(1)        | 2.0828(14) | Pt(1)–C(19)       | 1.9566(16) |
|                           | Pt(1)–N(2)        | 2.0860(13) | C(11)–C(12)       | 1.212(2)   |
|                           | Pt(1)–C(11)       | 1.9503(17) | C(19)–C(20)       | 1.210(2)   |
| <b>2</b>                  | Pt(1)–N(1)        | 2.0839(16) | Pt(1)–C(19)       | 1.954(2)   |
|                           | Pt(1)–N(2)        | 2.0858(16) | C(11)–C(12)       | 1.213(3)   |
|                           | Pt(1)–C(11)       | 1.9559(19) | C(19)–C(20)       | 1.206(3)   |
|                           | S(1)–O(1)         | 1.4893(15) |                   |            |
| Selected bond angles (°)  |                   |            |                   |            |
| <b>1</b>                  | N(1)–Pt(1)–N(2)   | 88.35(5)   | Pt(1)–C(11)–C(12) | 176.01(15) |
|                           | C(11)–Pt(1)–C(19) | 90.69(7)   | Pt(1)–C(19)–C(20) | 173.63(15) |
|                           | N(1)–Pt(1)–C(19)  | 176.92(6)  | C(6)–S(1)–C(1)    | 100.00(8)  |
|                           | N(2)–Pt(1)–C(11)  | 177.84(6)  |                   |            |
| <b>2</b>                  | N(1)–Pt(1)–N(2)   | 88.88(6)   | Pt(1)–C(11)–C(12) | 175.45(18) |
|                           | C(11)–Pt(1)–C(19) | 90.31(8)   | Pt(1)–C(19)–C(20) | 175.67(17) |
|                           | N(1)–Pt(1)–C(19)  | 177.61(7)  | C(6)–S(1)–C(1)    | 96.06(9)   |
|                           | N(2)–Pt(1)–C(11)  | 175.43(7)  |                   |            |

**Table S7.** Selected bond distances (Å) with estimated standard deviations (esds) in parentheses for **4–6**.

| Selected bond lengths (Å) |             |            |             |            |
|---------------------------|-------------|------------|-------------|------------|
| <b>4</b>                  | Pt(1)–N(1)  | 2.0899(13) | Pt(1)–C(21) | 1.9509(16) |
|                           | Pt(1)–N(2)  | 2.0834(13) | C(13)–C(14) | 1.188(2)   |
|                           | Pt(1)–C(13) | 1.9699(17) | C(21)–C(22) | 1.203(2)   |
| <b>5</b>                  | Pt(1)–N(1)  | 2.0873(19) | Pt(1)–C(21) | 1.952(2)   |
|                           | Pt(1)–N(2)  | 2.0843(18) | C(13)–C(14) | 1.202(3)   |
|                           | Pt(1)–C(13) | 1.964(2)   | C(21)–C(22) | 1.201(3)   |
|                           | S(1)–O(1)   | 1.4839(18) |             |            |
| <b>6</b>                  | Pt(1)–N(1)  | 2.1048(18) | Pt(1)–C(21) | 1.947(2)   |
|                           | Pt(1)–N(2)  | 2.0844(18) | C(13)–C(14) | 1.206(3)   |
|                           | Pt(1)–C(13) | 1.956(2)   | C(21)–C(22) | 1.204(3)   |
|                           | S(1)–O(1)   | 1.4342(17) | S(1)–O(2)   | 1.4364(16) |

**Table S8.** Selected bond angles ( $^{\circ}$ ) with estimated standard deviations (esds) in parentheses for 4–6.

| Selected bond angles ( $^{\circ}$ ) |                   |           |                   |            |
|-------------------------------------|-------------------|-----------|-------------------|------------|
| <b>4</b>                            | N(1)–Pt(1)–N(2)   | 88.03(5)  | Pt(1)–C(13)–C(14) | 176.07(14) |
|                                     | C(13)–Pt(1)–C(21) | 88.42(6)  | Pt(1)–C(21)–C(22) | 177.73(14) |
|                                     | N(1)–Pt(1)–C(21)  | 178.89(6) | C(7)–S(1)–C(1)    | 101.28(7)  |
|                                     | N(2)–Pt(1)–C(13)  | 177.73(5) |                   |            |
| <b>5</b>                            | N(1)–Pt(1)–N(2)   | 88.15(7)  | Pt(1)–C(13)–C(14) | 179.1(2)   |
|                                     | C(13)–Pt(1)–C(21) | 89.37(9)  | Pt(1)–C(21)–C(22) | 178.0(2)   |
|                                     | N(1)–Pt(1)–C(21)  | 178.58(8) | C(7)–S(1)–C(1)    | 94.89(11)  |
|                                     | N(2)–Pt(1)–C(13)  | 178.23(8) |                   |            |
| <b>6</b>                            | N(1)–Pt(1)–N(2)   | 88.85(7)  | Pt(1)–C(13)–C(14) | 177.30(19) |
|                                     | C(13)–Pt(1)–C(21) | 91.81(9)  | Pt(1)–C(21)–C(22) | 170.3(2)   |
|                                     | N(1)–Pt(1)–C(21)  | 175.68(8) | C(7)–S(1)–C(1)    | 102.69(10) |
|                                     | N(2)–Pt(1)–C(13)  | 179.33(8) | O(1)–S(1)–O(2)    | 119.05(10) |

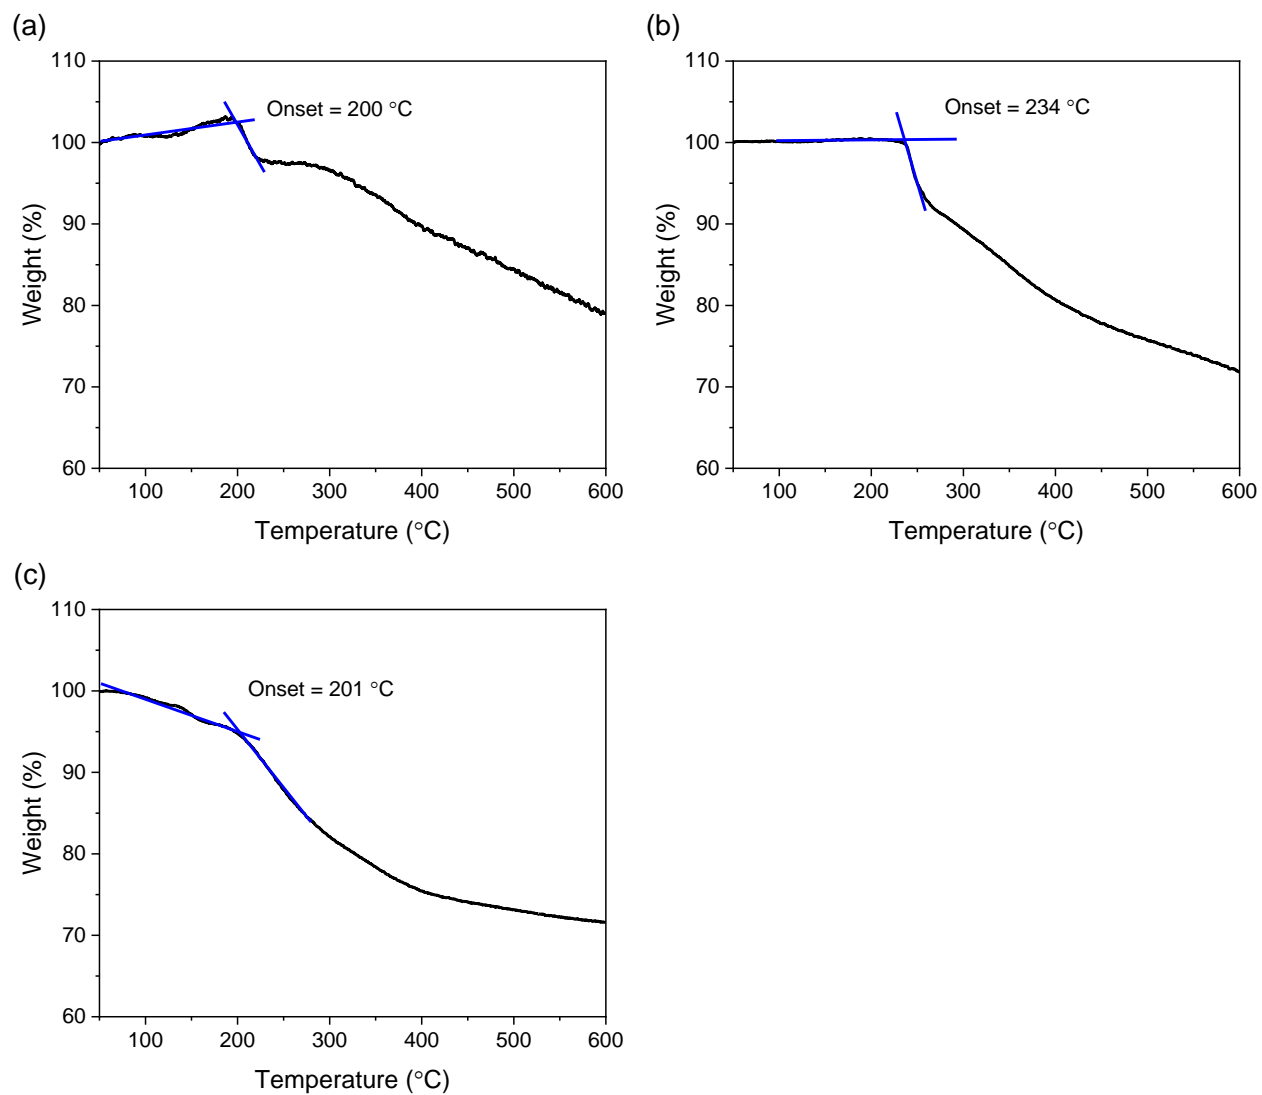

**Figure S24.** Thermogravimetric analysis of complexes (a) **1**, (b) **2** and (c) **3**.

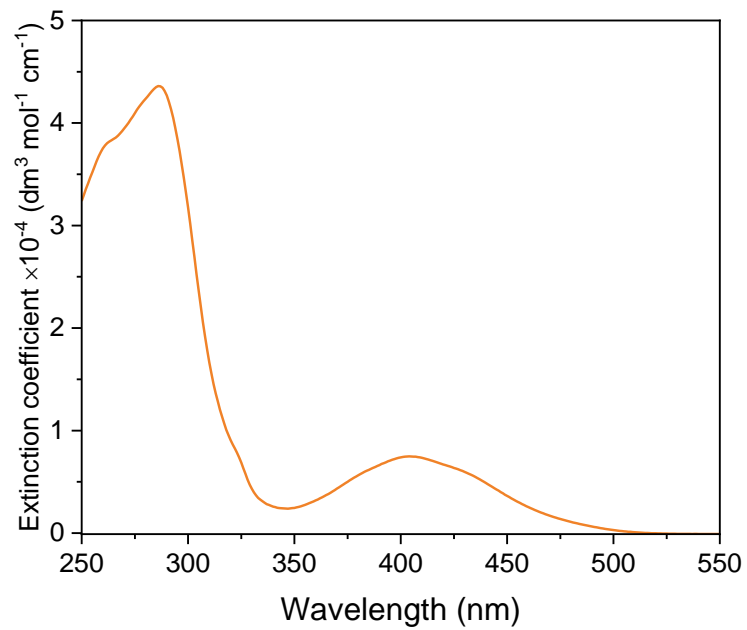

**Figure S25.** Electronic absorption spectra of **[Pt(bpy)(C≡CPh)<sub>2</sub>]** in dichloromethane solution at 298 K.

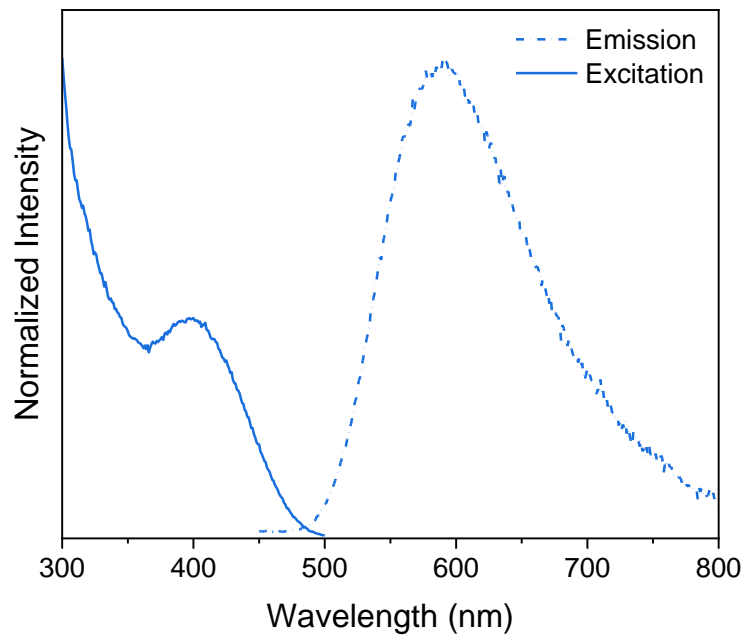

**Figure S26.** Normalized excitation (solid line) and emission (dot line) spectra of complexes **3** in dichloromethane solution at 298 K.

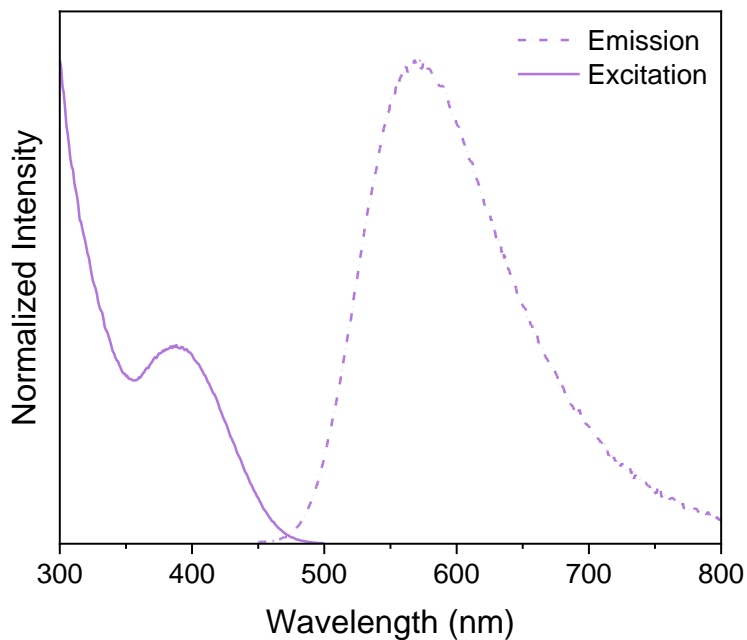

**Figure S27.** Normalized excitation (solid line) and emission (dot line) spectra of complexes **6** in dichloromethane solution at 298 K.

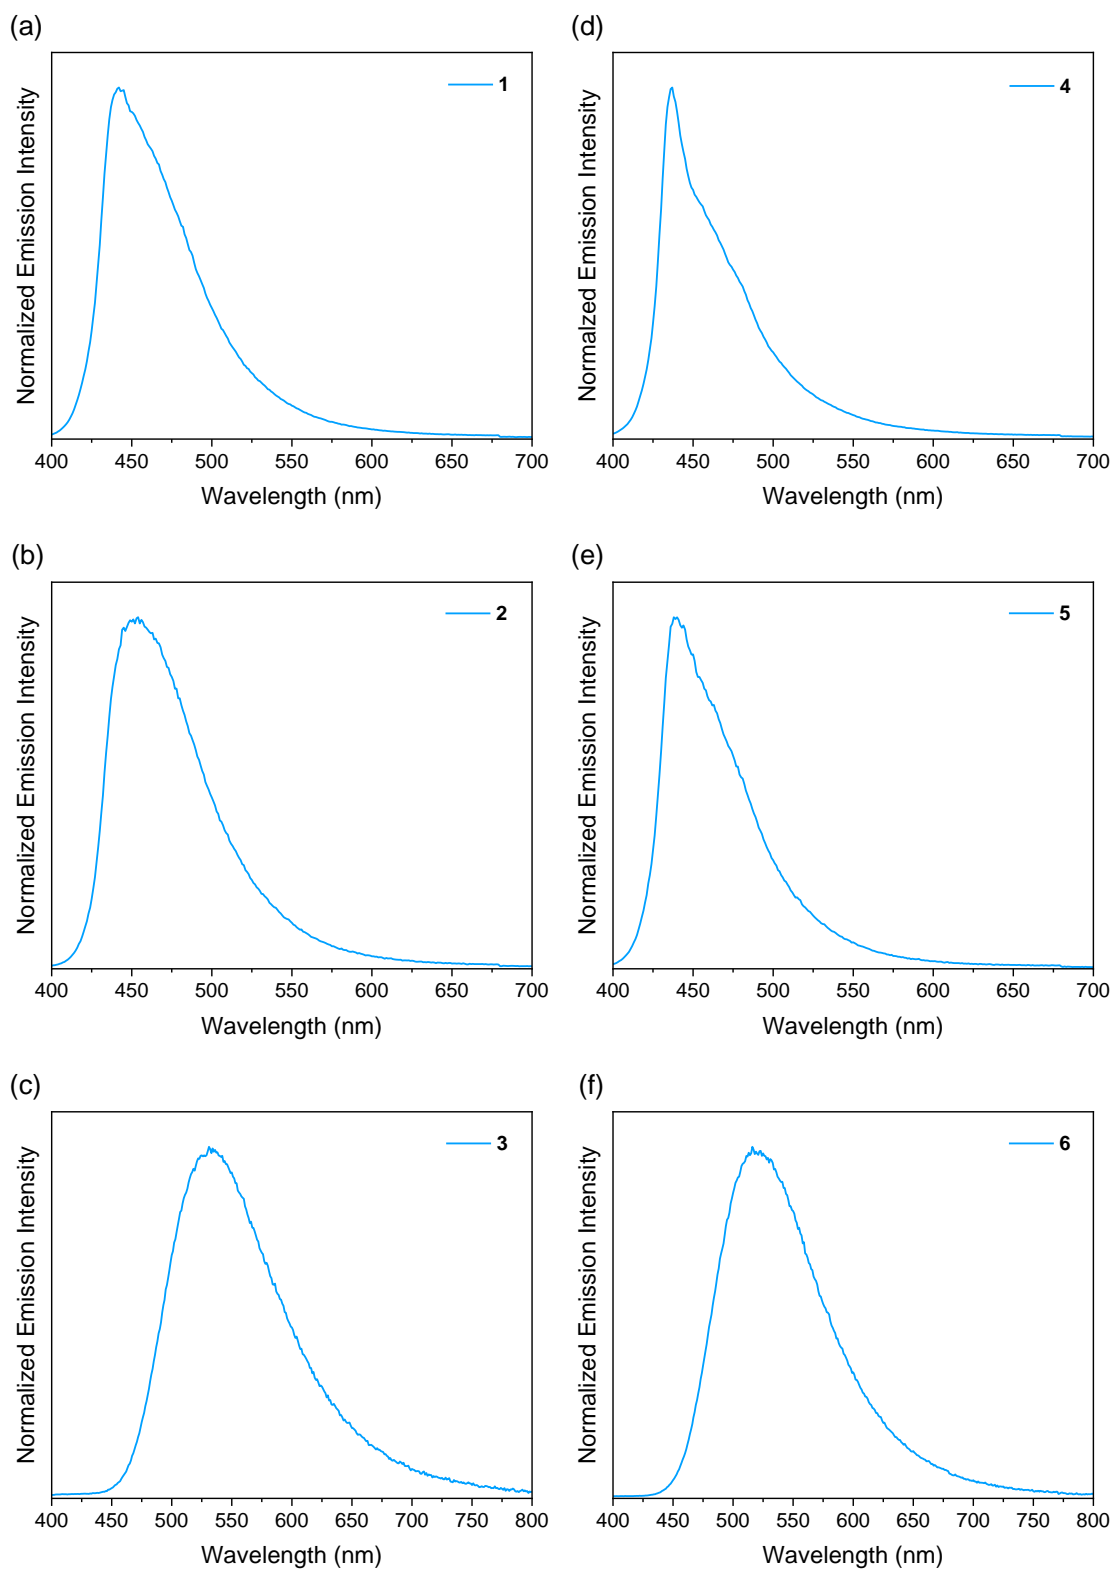

**Figure S28.** Photoluminescence spectra of the PMMA film (2 wt%) of (a) **1**, (b) **2**, (c) **3**, (d) **4**, (e) **5** and (f) **6** at 298 K.



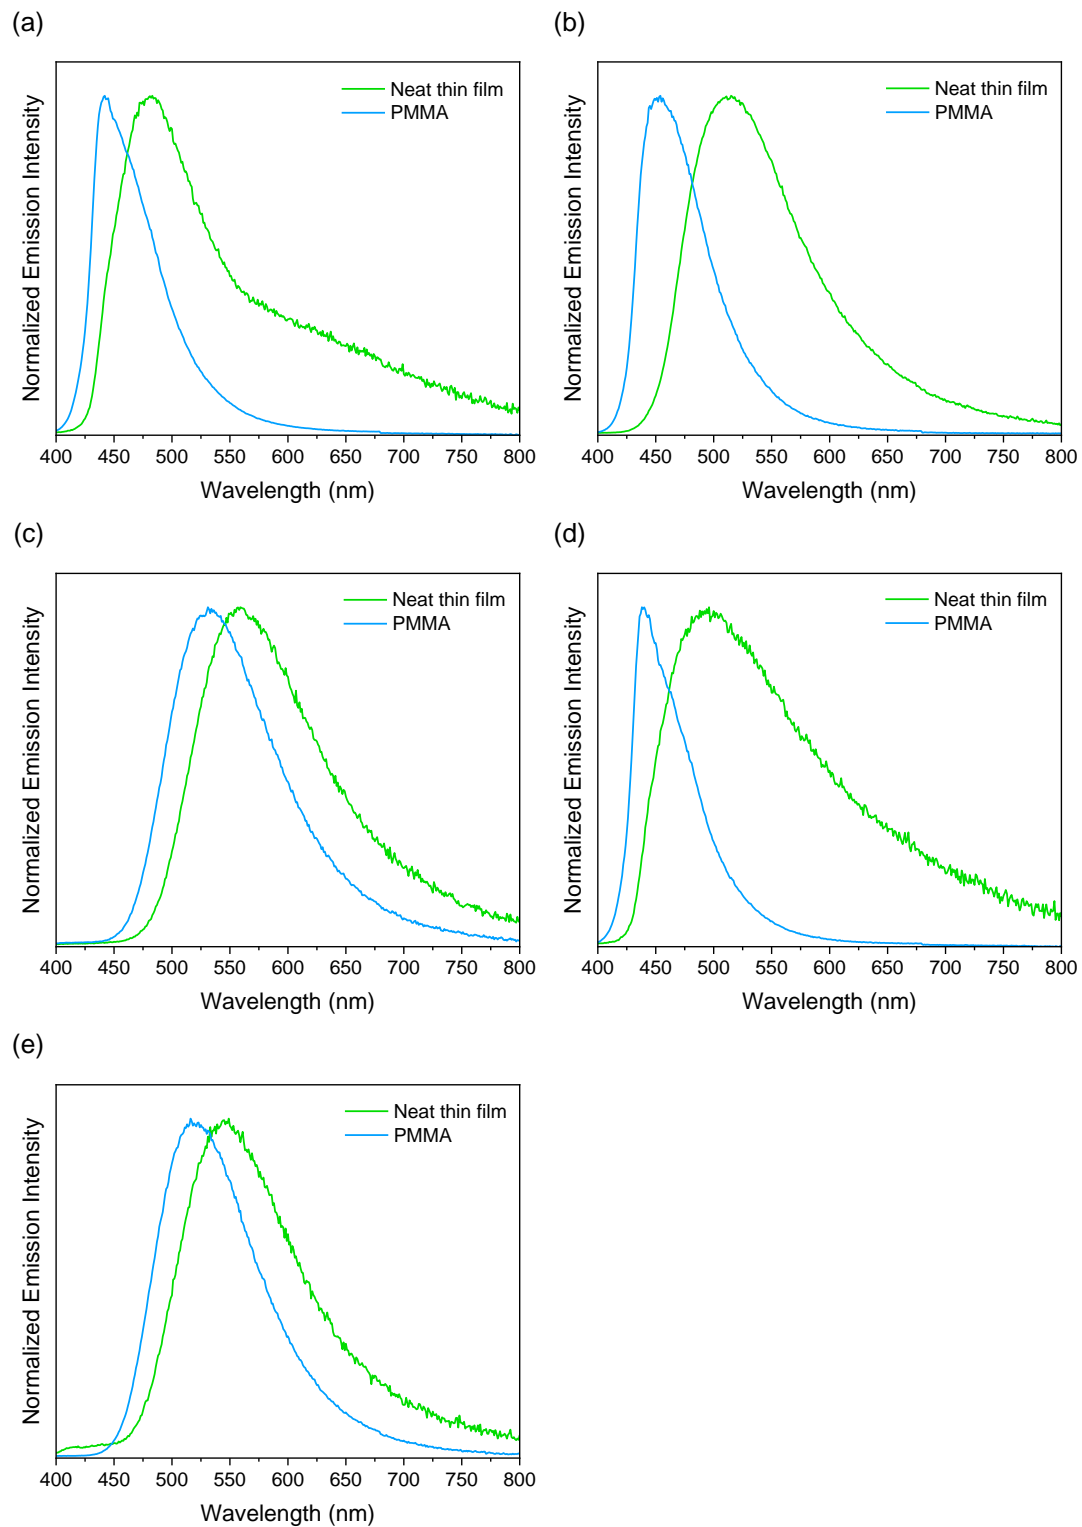

**Figure S29.** Overlaid photoluminescence spectra of the neat thin film and PMMA film (2 wt%) at 298 K of (a) **1**, (b) **2**, (c) **3**, (d) **5**, and (e) **6** ( $\lambda_{\text{ex}} = 365 \text{ nm}$ ).

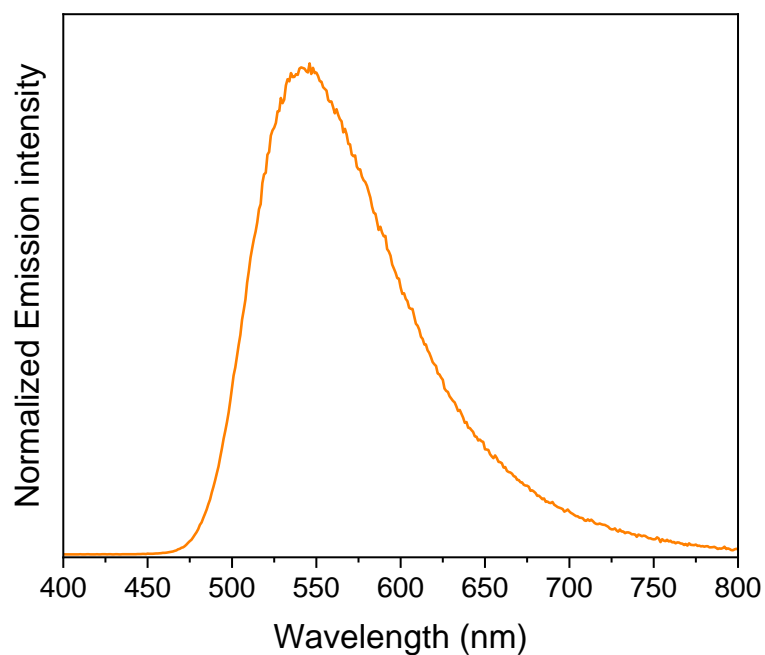

**Figure S30.** Photoluminescence spectra of a PMMA film (2 wt%) of  $[\text{Pt}(\text{bpy})(\text{C}\equiv\text{CPh})_2]$  at 298 K.

**Table S9.** CIE coordinates for complexes **1–6** and  $[\text{Pt}(\text{bpy})(\text{C}\equiv\text{CPh})_2]$ .

| complex                                               | CIE coordinates (CIE <sub>x</sub> , CIE <sub>y</sub> ) | CIE <sub>x</sub> + CIE <sub>y</sub> |
|-------------------------------------------------------|--------------------------------------------------------|-------------------------------------|
| <b>1</b>                                              | (0.15, 0.11)                                           | 0.26                                |
| <b>2</b>                                              | (0.15, 0.14)                                           | 0.29                                |
| <b>3</b>                                              | (0.34, 0.55)                                           | 0.89                                |
| <b>4</b>                                              | (0.16, 0.10)                                           | 0.26                                |
| <b>5</b>                                              | (0.15, 0.10)                                           | 0.25                                |
| <b>6</b>                                              | (0.29, 0.53)                                           | 0.82                                |
| $[\text{Pt}(\text{bpy})(\text{C}\equiv\text{CPh})_2]$ | (0.39, 0.57)                                           | 0.96                                |

**Table S10.** Photophysical data for complexes **1**, **2**, **4**, **5** and other deep-blue Pt(II) complexes in 2% PMMA films reported in the literature.<sup>15</sup>

| complex     | $\Phi_{em}$ | complex      | $\Phi_{em}$ |
|-------------|-------------|--------------|-------------|
| <b>1</b>    | 0.40        | <b>Pt-4</b>  | 0.15        |
| <b>2</b>    | 0.82        | <b>Pt-5</b>  | 0.43        |
| <b>4</b>    | 0.35        | <b>Pt-6</b>  | 0.30        |
| <b>5</b>    | 0.71        | <b>Pt-7</b>  | 0.30        |
| <b>Pt-1</b> | 0.014       | <b>Pt-8</b>  | 0.65        |
| <b>Pt-2</b> | 0.058       | <b>Pt-9</b>  | 0.56        |
| <b>Pt-3</b> | 0.23        | <b>Pt-10</b> | 0.58        |
| <b>Pt-4</b> | 0.15        |              |             |

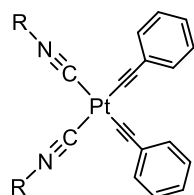

**Pt-1:** R = <sup>t</sup>Bu

**Pt-2:** R = 2,6-xylyl

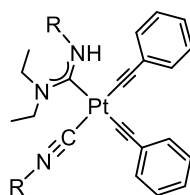

**Pt-3:** R = <sup>t</sup>Bu

**Pt-4:** R = 2,6-xylyl

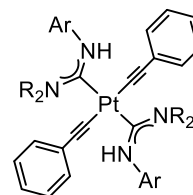

**Pt-5:** Ar = 2,6-xylyl ; R = C<sub>2</sub>H<sub>5</sub>

**Pt-6:** Ar = 2,6-xylyl ; R = CH<sub>3</sub>

*Chem. Eur. J.* **2020**

*Chem. Sci.* **2023**

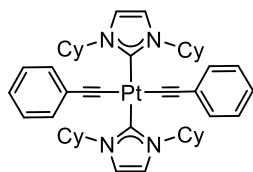

**Pt-7**

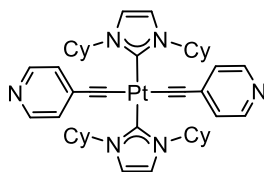

**Pt-8**

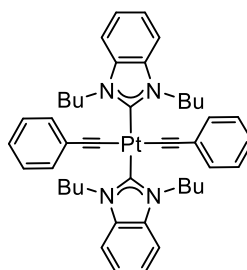

**Pt-9**

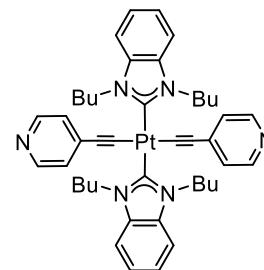

**Pt-10**

*ACS Appl. Electron. Mater.* **2020**

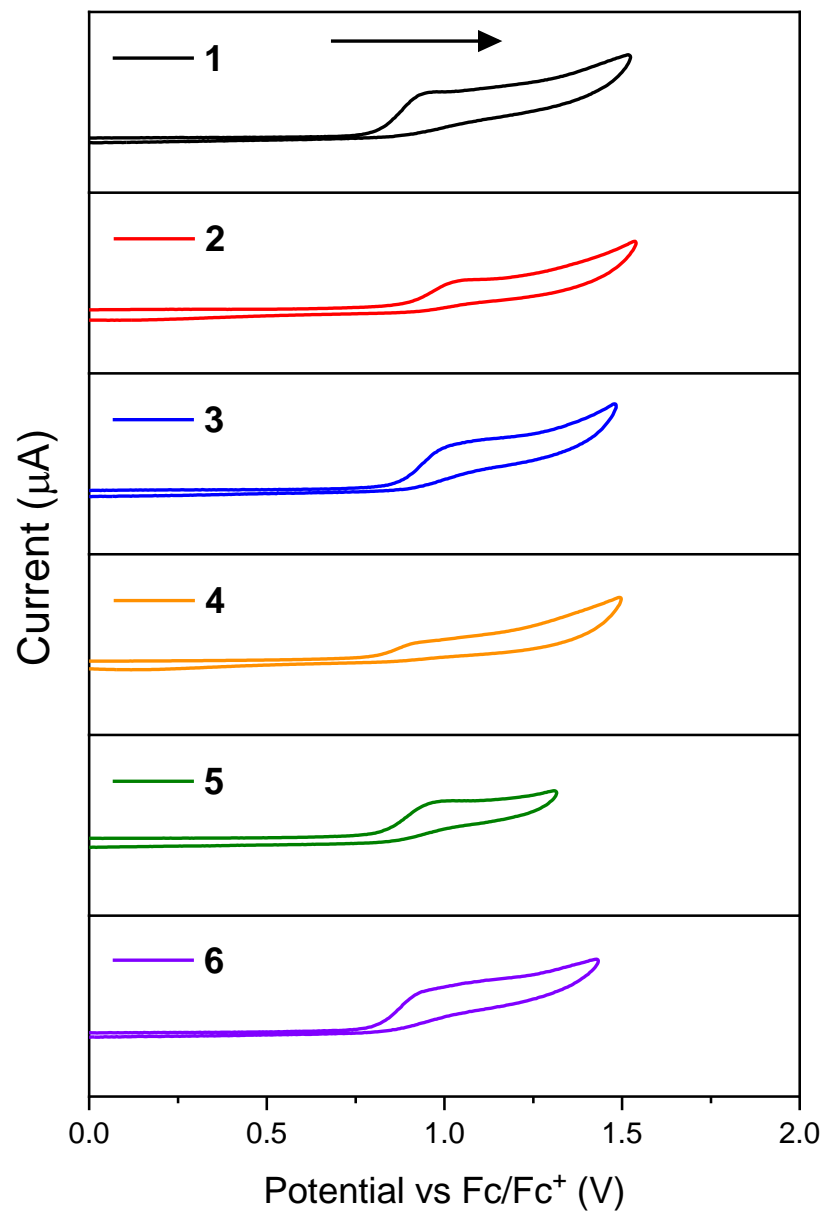

**Figure S31.** Oxidation waves of complexes 1–6 in acetonitrile solution ( $0.1 \text{ mol dm}^{-3} \text{ } ^n\text{Bu}_4\text{NPF}_6$ ) at a scan rate of  $100 \text{ mVs}^{-1}$  with  $\text{Fc}/\text{Fc}^+$  employed as a reference.

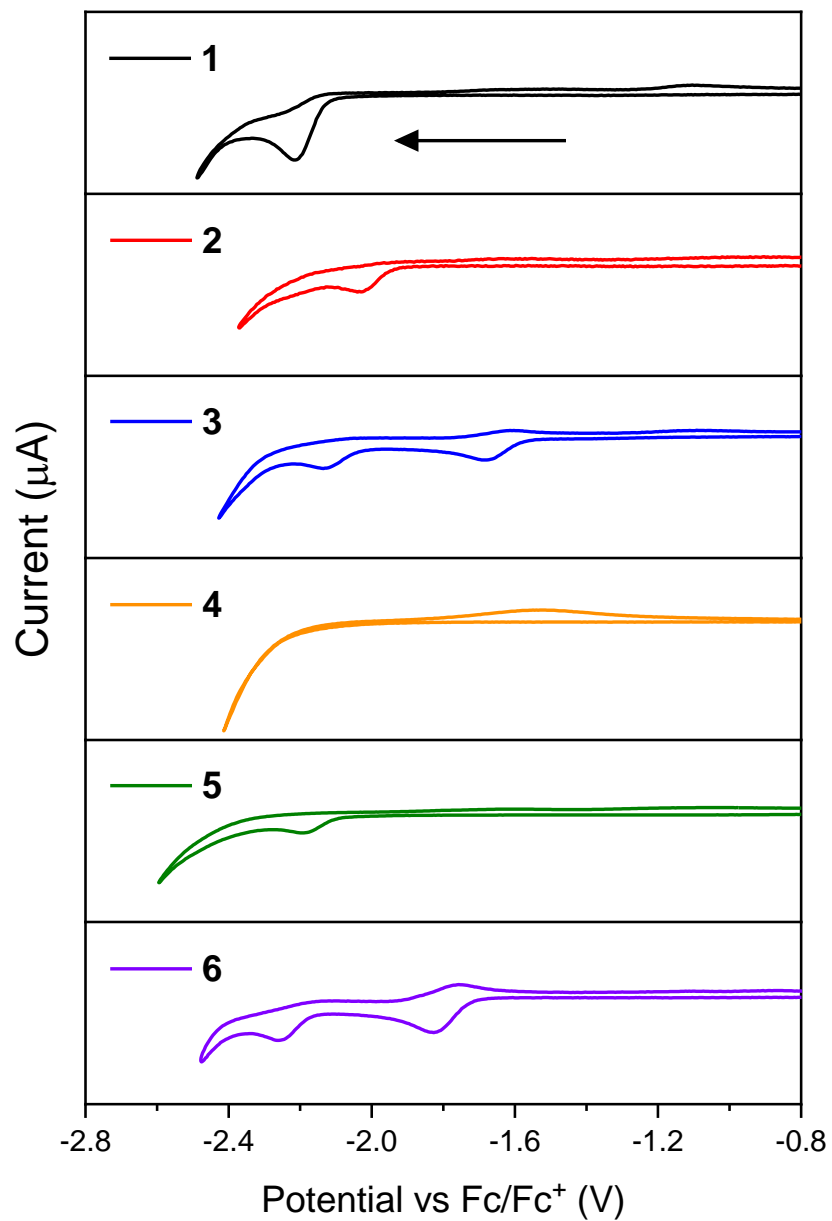

**Figure S32.** Reduction waves of complexes 1–6 in acetonitrile solution ( $0.1 \text{ mol dm}^{-3} \text{ } ^t\text{Bu}_4\text{NPF}_6$ ) at a scan rate of  $100 \text{ mVs}^{-1}$  with Fc/Fc<sup>+</sup> employed as a reference.

**Table S11.** Selected bond lengths (Å), bond angles (°) at optimized S<sub>0</sub> and T<sub>1</sub> geometry of complexes **1–3** within PBE0/ZORA-def2-SVP and solvent correction (CPCM) level of theory and the root-mean-square deviation (RMSD) comparing the optimized T<sub>1</sub> and S<sub>0</sub> geometries.

| complex           | <b>1</b>       |                | <b>2</b>       |                | <b>3</b>       |                |
|-------------------|----------------|----------------|----------------|----------------|----------------|----------------|
|                   | S <sub>0</sub> | T <sub>1</sub> | S <sub>0</sub> | T <sub>1</sub> | S <sub>0</sub> | T <sub>1</sub> |
| Pt(1)–N(1)        | 2.0921         | 2.08027        | 2.08772        | 2.07927        | 2.10025        | 2.0912         |
| Pt(1)–N(2)        | 2.0907         | 2.08127        | 2.0883         | 2.07738        | 2.10076        | 2.09494        |
| Pt(1)–C(11)       | 1.92696        | 1.89889        | 1.9278         | 1.89973        | 1.92754        | 1.8984         |
| Pt(1)–C(19)       | 1.92718        | 1.8985         | 1.92919        | 1.8994         | 1.92636        | 1.90178        |
| S(1)–O(1)         | –              | –              | 1.48096        | 1.48232        | 1.4297         | 1.43778        |
| S(1)–O(2)         | –              | –              | –              | –              | 1.43792        | 1.44063        |
| C(11)–C(12)       | 1.21584        | 1.23031        | 1.21534        | 1.23046        | 1.21523        | 1.22935        |
| C(19)–C(20)       | 1.21582        | 1.23094        | 1.21545        | 1.23048        | 1.21531        | 1.22779        |
| N(1)–Pt(1)–N(2)   | 90.44          | 87.966         | 89.633         | 87.451         | 91.184         | 88.476         |
| C(11)–Pt(1)–C(19) | 90.303         | 91.557         | 91.463         | 91.786         | 89.354         | 90.648         |
| N(1)–Pt(1)–C(19)  | 179.07         | 177.235        | 177.241        | 177.413        | 177.668        | 177.136        |
| N(2)–Pt(1)–C(11)  | 178.826        | 177.166        | 178.222        | 176.528        | 177.591        | 178.938        |
| C(6)–S(1)–C(1)    | 102.742        | 96.893         | 95.427         | 91.961         | 103.272        | 99.168         |
| O(1)–S(1)–O(2)    | –              | –              | –              | –              | 121.174        | 120.593        |
| Pt(1)–C(11)–C(12) | 175.665        | 177.085        | 175.34         | 176.903        | 176.963        | 178.493        |
| Pt(1)–C(19)–C(20) | 177.024        | 177.741        | 174.904        | 177.172        | 176.867        | 177.599        |
| $\tau_4$          | 0.015          | 0.040          | 0.032          | 0.043          | 0.034          | 0.028          |
| RMSD              | 0.465          |                | 0.516          |                | 0.898          |                |

**Table S12.** Selected bond lengths (Å), bond angles (°) at optimized S<sub>0</sub> and T<sub>1</sub> geometry of complexes **4**, **5** and **6** within PBE0/ZORA-def2-SVP and solvent correction (CPCM) level of theory and the root-mean-square deviation (RMSD) comparing the optimized T<sub>1</sub> and S<sub>0</sub> geometries.

| complex           | <b>4</b>       |                | <b>5</b>       |                | <b>6</b>       |                |
|-------------------|----------------|----------------|----------------|----------------|----------------|----------------|
|                   | S <sub>0</sub> | T <sub>1</sub> | S <sub>0</sub> | T <sub>1</sub> | S <sub>0</sub> | T <sub>1</sub> |
| Pt(1)–N(1)        | 2.09193        | 2.08042        | 2.08722        | 2.07886        | 2.10161        | 2.09045        |
| Pt(1)–N(2)        | 2.09133        | 2.08009        | 2.08867        | 2.07817        | 2.10039        | 2.09267        |
| Pt(1)–C(13)       | 1.92724        | 1.89956        | 1.92823        | 1.89885        | 1.92772        | 1.89929        |
| Pt(1)–C(21)       | 1.9263         | 1.89582        | 1.92915        | 1.90034        | 1.92629        | 1.90213        |
| S(1)–O(1)         | –              | –              | 1.48169        | 1.48315        | 1.43009        | 1.43807        |
| S(1)–O(2)         | –              | –              | –              | –              | 1.43858        | 1.44126        |
| C(13)–C(14)       | 1.21603        | 1.23007        | 1.21549        | 1.23096        | 1.21544        | 1.22924        |
| C(21)–C(22)       | 1.21594        | 1.23145        | 1.21556        | 1.23022        | 1.2154         | 1.22804        |
| N(1)–Pt(1)–N(2)   | 90.45          | 88.244         | 89.381         | 87.231         | 91.058         | 88.587         |
| C(13)–Pt(1)–C(21) | 89.919         | 91.717         | 91.259         | 91.882         | 89.592         | 90.298         |
| N(1)–Pt(1)–C(21)  | 178.702        | 176.5          | 177.359        | 176.059        | 178.133        | 177.453        |
| N(2)–Pt(1)–C(13)  | 178.29         | 177.77         | 178.215        | 176.794        | 177.291        | 178.442        |
| C(1)–S(1)–C(7)    | 102.825        | 96.778         | 95.239         | 91.337         | 103.322        | 99.244         |
| O(1)–S(1)–O(2)    | –              | –              | –              | –              | 121.024        | 120.537        |
| Pt(1)–C(13)–C(14) | 176.067        | 176.358        | 175.903        | 177.182        | 176.736        | 178.71         |
| Pt(1)–C(21)–C(22) | 176.912        | 177.834        | 175.601        | 176.038        | 176.645        | 178.226        |
| $\tau_4$          | 0.021          | 0.041          | 0.031          | 0.051          | 0.032          | 0.029          |
| RMSD              | 0.496          |                | 0.596          |                | 0.954          |                |

**Figure S33.** Ground-state frontier orbitals for the complexes 1–3.

**Complex 1**

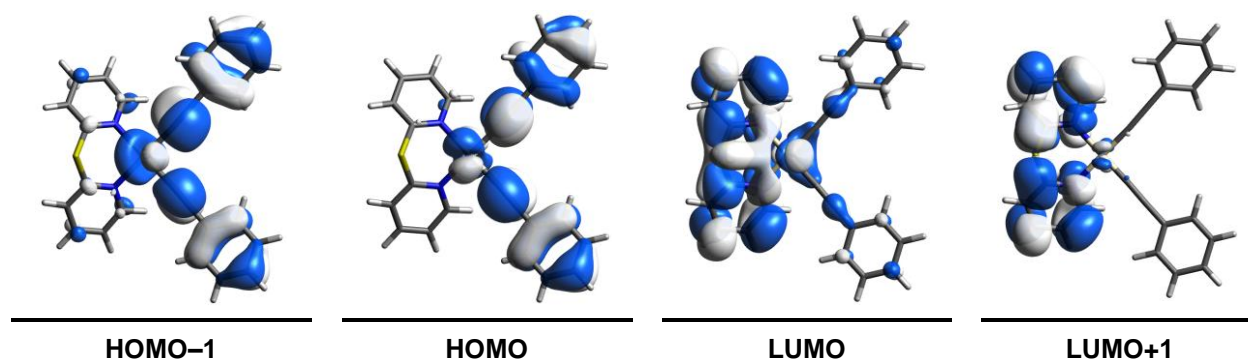

**Complex 2**

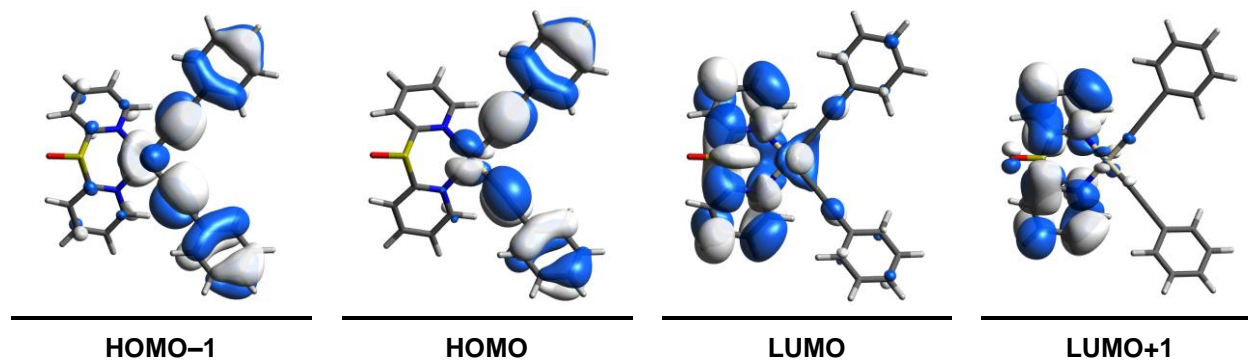

**Complex 3**

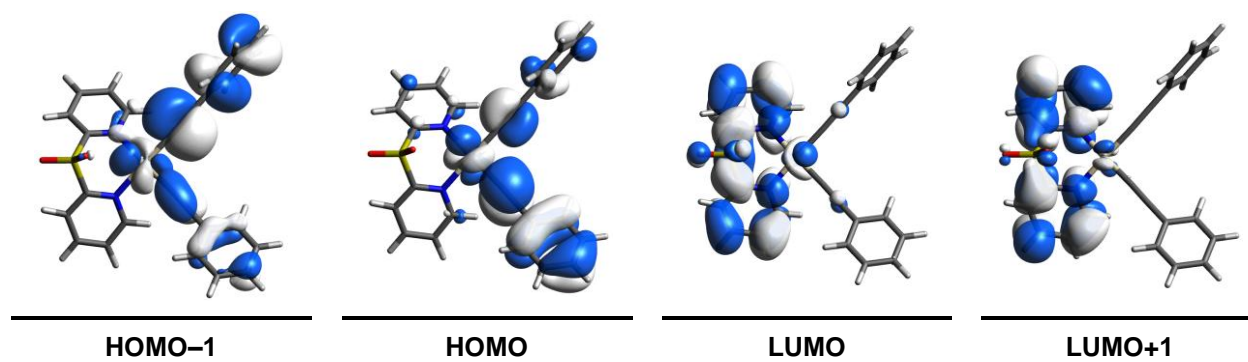



**Figure S34.** Ground-state frontier orbitals for the complexes 4–6.

**Complex 4**

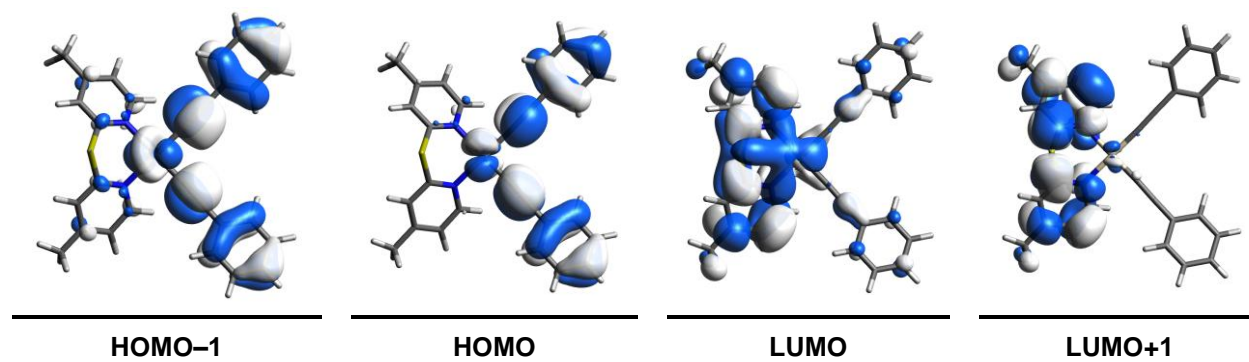

**Complex 5**

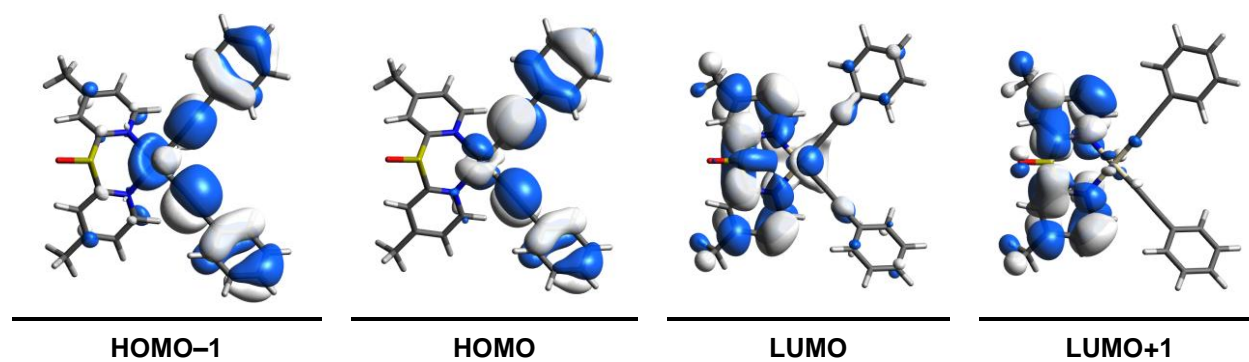

**Complex 6**

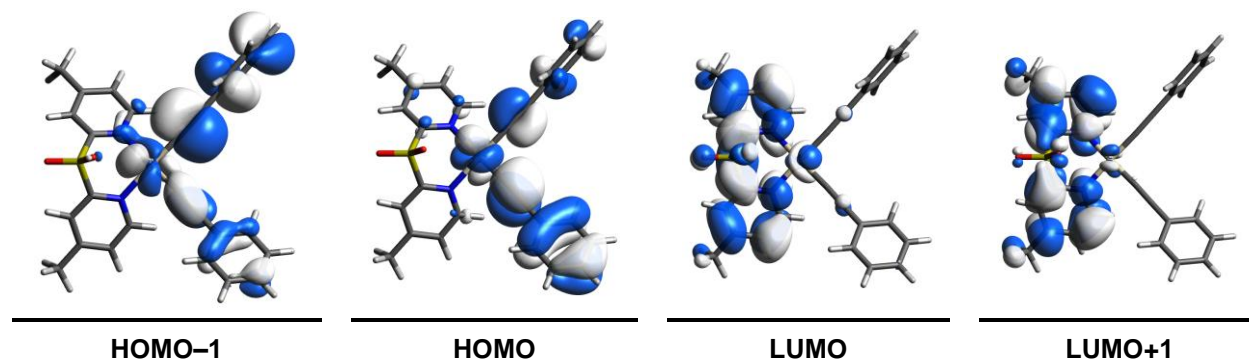

**Table S13.** Ground-state frontier orbital energies for the complexes **1–6** within PBE0/def2-TZVP(-f) and ZORA scalar-relativistic corrections level of theory.

| complex  | orbitals energy (eV) |       |       |        |
|----------|----------------------|-------|-------|--------|
|          | HOMO-1               | HOMO  | LUMO  | LUMO+1 |
| <b>1</b> | -6.08                | -5.93 | -1.93 | -1.81  |
| <b>2</b> | -6.14                | -6.03 | -2.15 | -1.82  |
| <b>3</b> | -6.20                | -6.07 | -2.58 | -1.91  |
| <b>4</b> | -6.02                | -5.91 | -1.78 | -1.65  |
| <b>5</b> | -6.11                | -5.98 | -1.98 | -1.64  |
| <b>6</b> | -6.17                | -6.03 | -2.41 | -1.73  |

**Table S14.** Selected excited states of complexes **1–3** with vertical excitation and oscillator strength calculated by TD-DFT at optimized geometries within PBE0/def2-SVP(-f) and ZORA scalar-relativistic corrections level of theory.

| complex         | state <sup>[a]</sup> | excitation (contribution) <sup>[b]</sup> | nature of transition   | energy (eV) | oscillator strength ( <i>f</i> ) |
|-----------------|----------------------|------------------------------------------|------------------------|-------------|----------------------------------|
| <b>1</b>        | S <sub>1</sub>       | H → L (0.92)                             | MLCT, LLCT             | 3.26        | 0.1421                           |
|                 | S <sub>2</sub>       | H → L+1 (0.55)                           | MLCT, LLCT             | 3.35        | 0.0390                           |
|                 |                      | H-1 → L (0.43)                           | MLCT, LLCT             |             |                                  |
|                 | S <sub>3</sub>       | H-1 → L (0.52)                           | MLCT, LLCT             | 3.51        | 0.3187                           |
|                 |                      | H → L+1 (0.42)                           | MLCT, LLCT             |             |                                  |
|                 | S <sub>4</sub>       | H-1 → L+1 (0.88)                         | MLCT, LLCT             | 3.54        | 0.1103                           |
|                 | S <sub>14</sub>      | H → L+4 (0.91)                           | MLCT, LLCT, <i>d-d</i> | 4.36        | 0.4629                           |
| <b>2</b>        | S <sub>1</sub>       | H → L (0.96)                             | MLCT, LLCT             | 3.16        | 0.1374                           |
|                 | S <sub>2</sub>       | H-1 → L (0.88)                           | MLCT, LLCT             | 3.27        | 0.1714                           |
|                 | S <sub>3</sub>       | H → L+1 (0.86)                           | MLCT, LLCT             | 3.53        | 0.0994                           |
|                 | S <sub>4</sub>       | H-1 → L+1 (0.93)                         | MLCT, LLCT             | 3.61        | 0.0907                           |
|                 | S <sub>13</sub>      | H → L+4 (0.87)                           | MLCT, LLCT, <i>d-d</i> | 4.36        | 0.4299                           |
| <b>3</b>        | S <sub>1</sub>       | H → L (0.97)                             | MLCT, LLCT             | 2.78        | 0.0993                           |
|                 | S <sub>3</sub>       | H-2 → L (0.94)                           | MLCT, LLCT             | 3.25        | 0.0970                           |
|                 | S <sub>8</sub>       | H → L+2 (0.92)                           | MLCT, LLCT             | 3.80        | 0.1059                           |
|                 | S <sub>10</sub>      | H-1 → L+2 (0.66)                         | MLCT, LLCT             | 3.94        | 0.0948                           |
|                 |                      | H-2 → L+1 (0.26)                         | MLCT, LLCT             |             |                                  |
| S <sub>19</sub> | H → L+4 (0.73)       | MLCT, LLCT, <i>d-d</i>                   | 4.55                   | 0.4896      |                                  |

<sup>[a]</sup> Vertical states taking S<sub>0</sub> geometry as the reference; <sup>[b]</sup> Transitions high percentage higher than 20% are shown in parenthesis.

**Table S15.** Selected excited states of complexes **4–6** with vertical excitation and oscillator strength calculated by TD-DFT at optimized geometries within PBE0/def2-SVP(-f) and ZORA scalar-relativistic corrections level of theory.

| complex         | state <sup>[a]</sup> | excitation (contribution) <sup>[b]</sup> | nature of transition   | energy (eV) | oscillator strength ( <i>f</i> ) |
|-----------------|----------------------|------------------------------------------|------------------------|-------------|----------------------------------|
| <b>4</b>        | S <sub>1</sub>       | H → L (0.91)                             | MLCT, LLCT             | 3.39        | 0.1627                           |
|                 | S <sub>2</sub>       | H-1 → L (0.62)                           | MLCT, LLCT             | 3.47        | 0.1121                           |
|                 |                      | H → L+1 (0.35)                           | MLCT, LLCT             |             |                                  |
|                 | S <sub>3</sub>       | H → L+1 (0.58)                           | MLCT, LLCT             | 3.62        | 0.2771                           |
|                 |                      | H-1 → L (0.33)                           | MLCT, LLCT             |             |                                  |
|                 | S <sub>4</sub>       | H-1 → L+1 (0.86)                         | MLCT, LLCT             | 3.65        | 0.1487                           |
|                 | S <sub>14</sub>      | H → L+4 (0.89)                           | MLCT, LLCT, <i>d-d</i> | 4.38        | 0.4210                           |
| <b>5</b>        | S <sub>1</sub>       | H → L (0.96)                             | MLCT, LLCT             | 3.28        | 0.1517                           |
|                 | S <sub>2</sub>       | H-1 → L (0.89)                           | MLCT, LLCT             | 3.41        | 0.2082                           |
|                 | S <sub>3</sub>       | H → L+1 (0.87)                           | MLCT, LLCT             | 3.66        | 0.1042                           |
|                 | S <sub>4</sub>       | H-1 → L+1 (0.53)                         | MLCT, LLCT             | 3.76        | 0.0589                           |
|                 |                      | H-2 → L (0.40)                           | MLCT, LLCT             |             |                                  |
|                 | S <sub>5</sub>       | H-2 → L (0.52)                           | MLCT, LLCT             | 3.77        | 0.0943                           |
|                 |                      | H-1 → L+1 (0.41)                         | MLCT, LLCT             |             |                                  |
| S <sub>13</sub> | H → L+4 (0.92)       | MLCT, LLCT, <i>d-d</i>                   | 4.34                   | 0.4630      |                                  |
| <b>6</b>        | S <sub>1</sub>       | H → L (0.97)                             | MLCT, LLCT             | 2.92        | 0.1056                           |
|                 | S <sub>3</sub>       | H-2 → L (0.95)                           | MLCT, LLCT             | 3.36        | 0.1047                           |
|                 | S <sub>8</sub>       | H → L+2 (0.78)                           | MLCT, LLCT             | 3.83        | 0.1469                           |
|                 | S <sub>10</sub>      | H-2 → L+2 (0.88)                         | MLCT, LLCT             | 4.04        | 0.0920                           |
|                 | S <sub>19</sub>      | H → L+4 (0.63)                           | MLCT, LLCT, <i>d-d</i> | 4.54        | 0.4107                           |

<sup>[a]</sup> Vertical states taking S<sub>0</sub> geometry as the reference; <sup>[b]</sup> Transitions high percentage higher than 20% are shown in parenthesis.

**Table S16.** Selected excited states of **1–6** with vertical excitation and oscillator strength calculated by SOC-TD-DFT at optimized geometries within PBE0/def2-SVP(-f) and ZORA scalar-relativistic corrections level of theory.

| complex  | state <sup>[a]</sup> | excitation (contribution) <sup>[b]</sup> | nature of transition | energy (eV) | oscillator strength ( <i>f</i> ) <sup>[c]</sup> |
|----------|----------------------|------------------------------------------|----------------------|-------------|-------------------------------------------------|
| <b>1</b> | T <sub>1</sub>       | H → L (0.73)                             | MLCT, LLCT           | 3.02        | 1.60 × 10 <sup>-3</sup>                         |
|          | T <sub>2</sub>       | H-1 → L (0.69)                           | MLCT, LLCT           | 3.11        | 5.46 × 10 <sup>-3</sup>                         |
| <b>2</b> | T <sub>1</sub>       | H → L (0.80)                             | MLCT, LLCT           | 2.98        | 2.70 × 10 <sup>-3</sup>                         |
|          | T <sub>2</sub>       | H-1 → L (0.80)                           | MLCT, LLCT           | 3.04        | 7.98 × 10 <sup>-3</sup>                         |
| <b>3</b> | T <sub>1</sub>       | H → L (0.94)                             | MLCT, LLCT           | 2.67        | 8.46 × 10 <sup>-3</sup>                         |
| <b>4</b> | T <sub>1</sub>       | H → L (0.63)                             | MLCT, LLCT           | 3.09        | 1.53 × 10 <sup>-3</sup>                         |
|          | T <sub>2</sub>       | H-1 → L (0.61)                           | MLCT, LLCT           | 3.16        | 2.86 × 10 <sup>-3</sup>                         |
| <b>5</b> | T <sub>1</sub>       | H → L (0.69)                             | MLCT, LLCT           | 3.04        | 2.12 × 10 <sup>-3</sup>                         |
|          | T <sub>2</sub>       | H-1 → L (0.68)                           | MLCT, LLCT           | 3.14        | 7.23 × 10 <sup>-3</sup>                         |
| <b>6</b> | T <sub>1</sub>       | H → L (0.91)                             | MLCT, LLCT           | 2.79        | 8.50 × 10 <sup>-4</sup>                         |

<sup>[a]</sup> Vertical states taking S<sub>0</sub> geometry as the reference; <sup>[b]</sup> Transitions high percentage higher than 20% are shown in parenthesis; <sup>[c]</sup> *f* for the triplet states is shown as an average of the substates x, y and z.

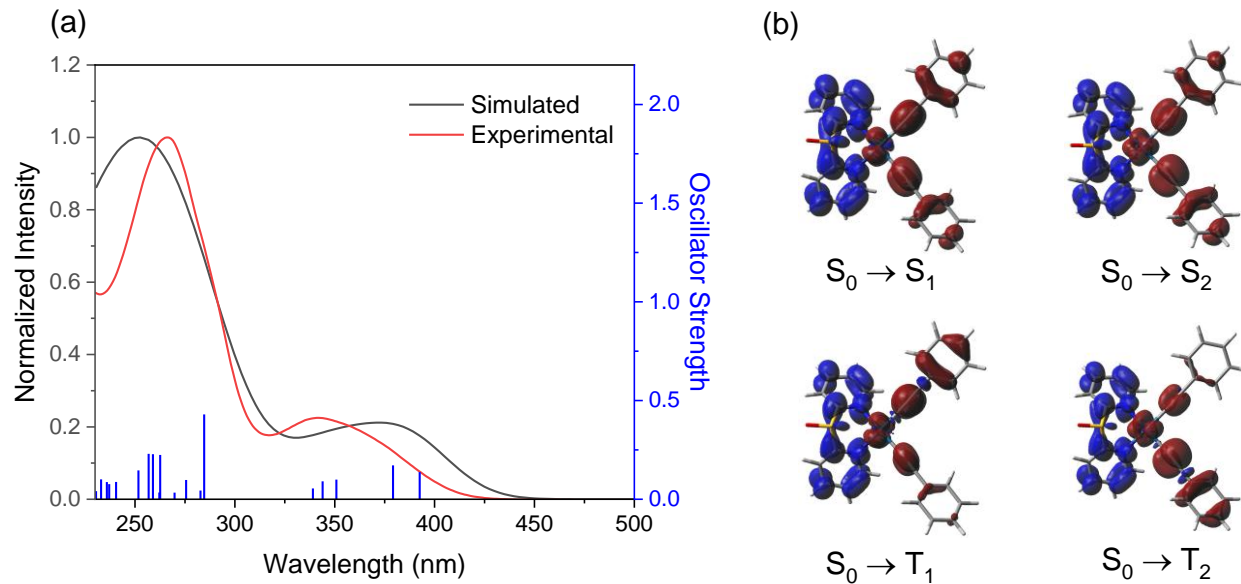

**Figure S35.** (a) Simulated (black trace) and experimental (red trace) electronic absorption spectra for complex **2**. Transition energies and oscillator strengths calculated from TD-DFT calculations are shown by blue vertical lines, and the simulated spectrum is deconvoluted with Gaussian functions. (b) Electronic difference plots with the accumulation (blue) and depletion (red) of charge for the lowest-energy transitions and the triplet states.

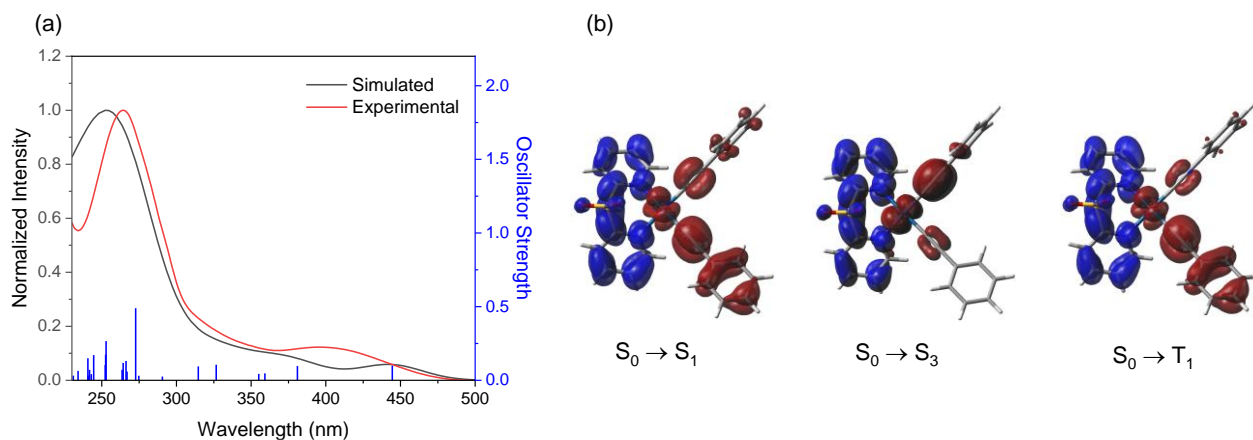

**Figure S36.** (a) Simulated (black trace) and experimental (red trace) electronic absorption spectra for complex **3**. Transition energies and oscillator strengths calculated from TD-DFT calculations are shown by blue vertical lines, and the simulated spectrum is deconvoluted with Gaussian functions. (b) Electronic difference plots with the accumulation (blue) and depletion (red) of charge for the lowest-energy transitions and the triplet states.

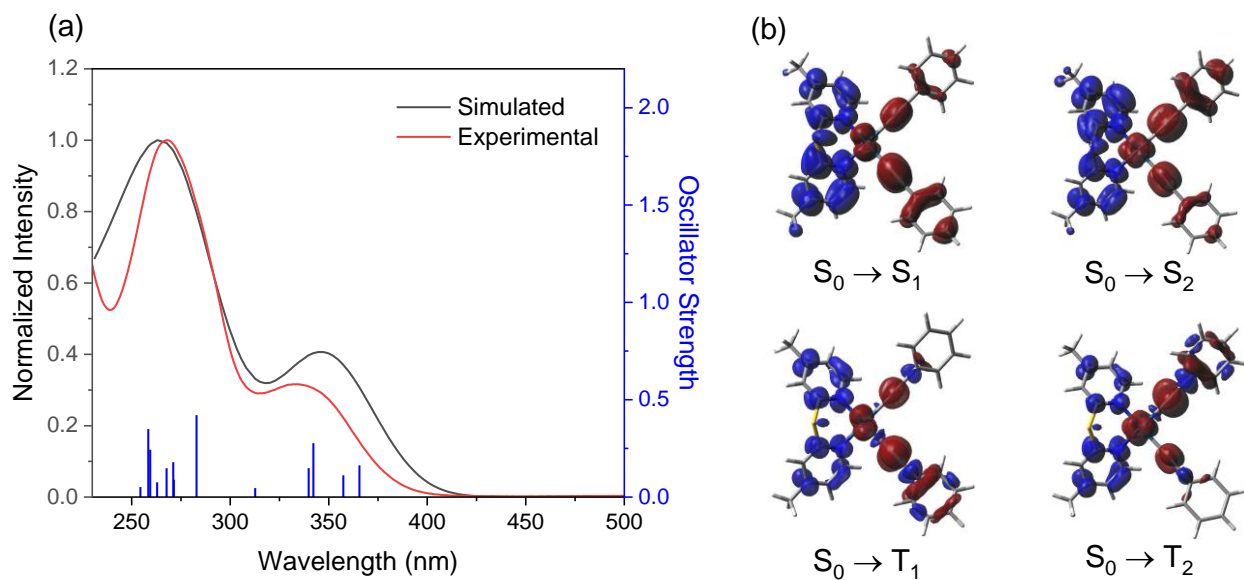

**Figure S37.** (a) Simulated (black trace) and experimental (red trace) electronic absorption spectra for complex **4**. Transition energies and oscillator strengths calculated from TD-DFT calculations are shown by blue vertical lines, and the simulated spectrum is deconvoluted with Gaussian functions. (b) Electronic difference plots with the accumulation (blue) and depletion (red) of charge for the lowest-energy transitions and the triplet states.



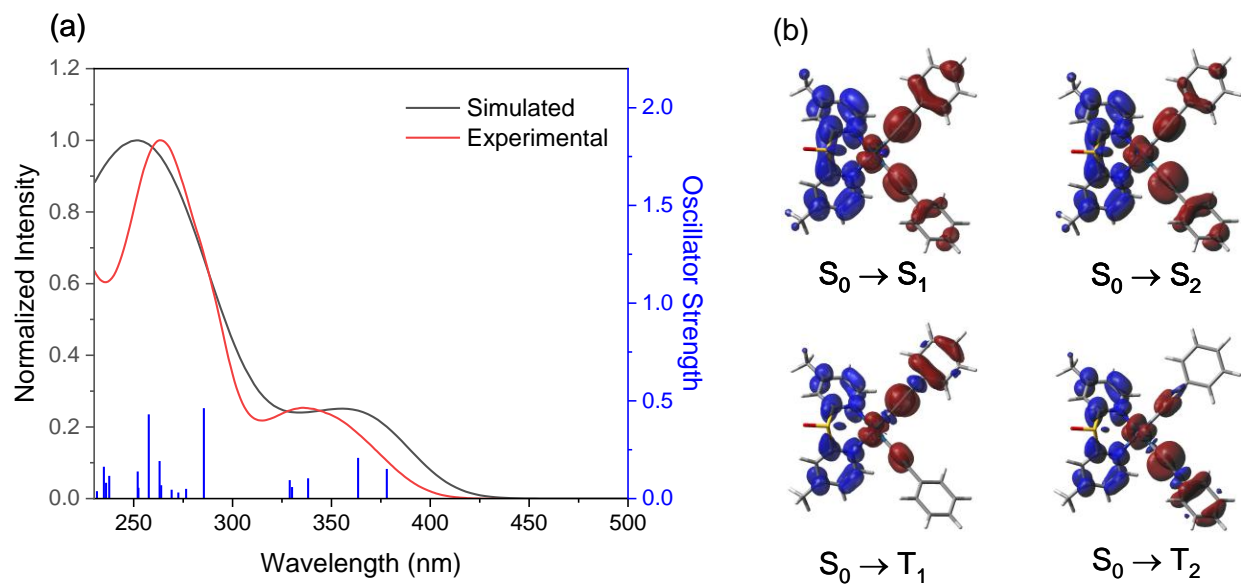

**Figure S38.** (a) Simulated (black trace) and experimental (red trace) electronic absorption spectra for complex **5**. Transition energies and oscillator strengths calculated from TD-DFT calculations are shown by blue vertical lines, and the simulated spectrum is deconvoluted with Gaussian functions. (b) Electronic difference plots with the accumulation (blue) and depletion (red) of charge for the lowest-energy transitions and the triplet states.

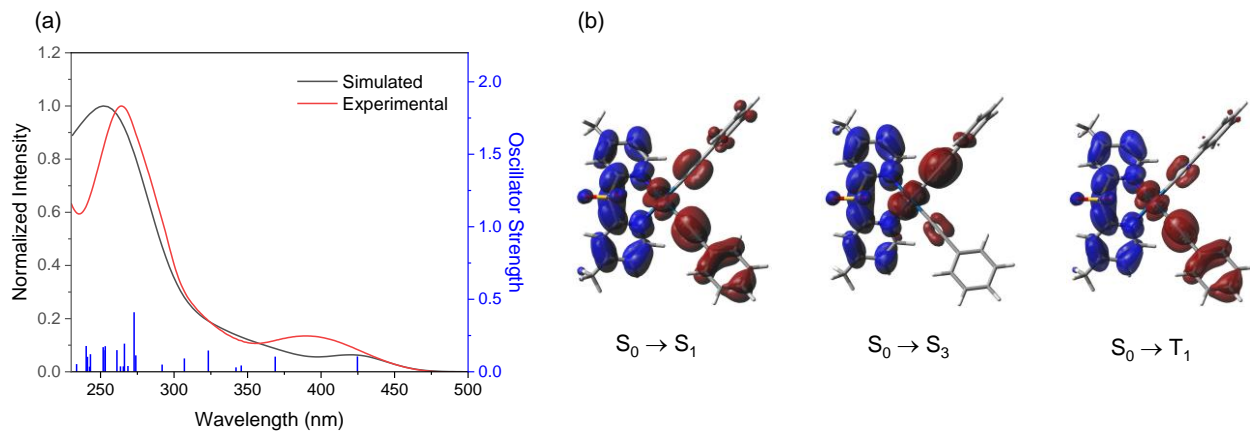

**Figure S39.** (a) Simulated (black trace) and experimental (red trace) electronic absorption spectra for complex **6**. Transition energies and oscillator strengths calculated from TD-DFT calculations are shown by blue vertical lines, and the simulated spectrum is deconvoluted with Gaussian functions. (b) Electronic difference plots with the accumulation (blue) and depletion (red) of charge for the lowest-energy transitions and the triplet states.

**Table S17.** Data of SOCME (in  $\text{cm}^{-1}$ ) at optimized  $S_0$  geometry within PBE0/def2-SVP(-f) and ZORA scalar-relativistic corrections level of theory for complexes **1–6**.

| complex                                    | 1   | 2   | 3              | 4   | 5   | 6              |
|--------------------------------------------|-----|-----|----------------|-----|-----|----------------|
| $\langle T_1   H_{SO}   S_0 \rangle^{[a]}$ | 102 | 165 | 237            | 54  | 127 | 209            |
| $\langle T_2   H_{SO}   S_0 \rangle^{[a]}$ | 123 | 57  | <sup>[b]</sup> | 86  | 59  | <sup>[b]</sup> |
| $\sum \langle T_n   H_{SO}   S_0 \rangle$  | 225 | 223 | 237            | 140 | 187 | 209            |
| $\langle T_1   H_{SO}   S_1 \rangle^{[a]}$ | 77  | 126 | 117            | 50  | 141 | 119            |
| $\langle T_2   H_{SO}   S_1 \rangle^{[a]}$ | 562 | 588 | <sup>[b]</sup> | 534 | 556 | <sup>[b]</sup> |
| $\sum \langle T_n   H_{SO}   S_1 \rangle$  | 639 | 714 | 117            | 584 | 697 | 119            |

<sup>[a]</sup>  $\sqrt{\langle (S_i | H_{SO} | T_j)^2 \rangle}$  in the  $S_0$  geometry. <sup>[b]</sup>  $T_2$  state is not considered because it has a higher energy than  $S_1$ .

**Table S18.** Calculated adiabatic, vertical transition within PBE0/def2-SVP(-f) and ZORA scalar-relativistic corrections level of theory and experimental emission in solid energies for complexes **1–6**.

| complex  | adiabatic energy $\Delta E$ (eV) | SOC $T_1$ ( $S_0$ ) (eV) | experimental $E_{em}$ (eV) |
|----------|----------------------------------|--------------------------|----------------------------|
| <b>1</b> | 2.46                             | 3.02                     | 2.81                       |
| <b>2</b> | 2.40                             | 2.98                     | 2.74                       |
| <b>3</b> | 1.98                             | 2.67                     | 2.33                       |
| <b>4</b> | 2.53                             | 3.09                     | 2.84                       |
| <b>5</b> | 2.48                             | 3.04                     | 2.82                       |
| <b>6</b> | 2.04                             | 2.79                     | 2.39                       |

## References

---

1. H. Lang, P. Zoufalá, S. Klaib, A. del Villar, G. Rheinwald, *J. Organomet. Chem.* 2007, **692**, 4168–4176.
2. C. M. Brown, M. Kitt, Z. Xu, D. Hean, M. Ezhova, M. O. Wolf, *Inorg. Chem.* 2017, **56**, 15110–15118.
3. J. N. Demas, G. A. Crosby, *J. Phys. Chem.* 1971, **75**, 991–1024.
4. SAINT, Version 8.40B; Bruker AXS Inc.: Madison, WI, USA, 2019.
5. L. Krause, R. Herbst-Irmer, G. M. Sheldrick, D. Stalke, *J. Appl. Crystallogr.* 2015, **48**, 3–10.
6. O. V. Dolomanov, L. J. Bourhis, R. J. Gildea, J. A. K. Howard, H. Puschmann, *J. Appl. Crystallogr.* 2009, **42**, 339–341.
7. G. M. Sheldrick, *Acta Cryst.* 2015, **C71**, 3–8.
8. F. Neese, *WIREs Comput. Mol. Sci.* 2022, **12**, e1606.
9. (a) J. P. Perdew, K. Burke, M. Ernzerhof, *Phys. Rev. Lett.* 1996, **77**, 3865–3868. (b) J. P. Perdew, K. Burke, M. Ernzerhof, *Phys. Rev. Lett.* 1997, **78**, 1396–1396.
10. (a) F. Weigend, R. Ahlrichs, *Phys. Chem. Chem. Phys.* 2005, **7**, 3297–3305. (b) A. Schäfer, C. Huber, R. Ahlrichs, *J. Chem. Phys.* 1994, **100**, 5829–5835. (c) D. A. Pantazis, X.-Y. Chen, C. R. Landis, F. Neese, *J. Chem. Theory Comput.* 2008, **4**, 908–919.
11. (a) S. Grimme, J. Antony, S. Ehrlich, H. Krieg, *J. Chem. Phys.* 2010, **132**, 154104. (b) S. Grimme, S. Ehrlich, L. Goerigk, *J. Comput. Chem.* 2011, **32**, 1456–1465.
12. T. Petrenko, S. Kossmann, F. Neese, *J. Chem. Phys.* 2011, **134**, 054116.

---

13. J. Tomasi, B. Mennucci, R. Cammi, *Chem. Rev.* 2005, **105**, 2999–3094.

14. (a) B. de Souza, F. Neese, R. Izsák, *J. Chem. Phys.* 2018, **148**, 034104. (b) B. de Souza, G. Farias, F. Neese, R. Izsák, *J. Chem. Theory Comput.* 2019, **15**, 1896–1904.

15. (a) Y. Wu, Z. Wen, J. I.-C. Wu, T. S. Teets, *Chem. Eur. J.* 2020, **26**, 16028–16035. (b) J. D. Bullock, Z. Xu, S. Valandro, M. Younus, J. Xue, K. S. Schanze, *ACS Appl. Electron. Mater.* 2020, **2**, 1026–1034. (c) Y. H. Nguyen, V. Q. Dang, J. V. Soares, J. I. Wu, T. S. Teets, *Chem. Sci.*, 2023, **14**, 4857–4862.
